# Supplementary material
Source: MDPI journal article supplement (https://www.mdpi.com/2073-4344/11/12/1555)

## Supporting Information

### Photocatalytic Alkylation of $\alpha$ -(Trifluoromethyl)styrenes with Potassium Xanthogenates

Vyacheslav I. Supranovich and Alexander D. Dilman \*

N. D. Zelinsky Institute of Organic Chemistry, 119991 Moscow, Leninsky prosp. 47,  
Russian Federation

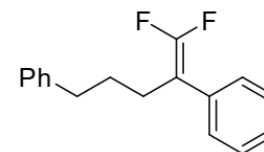**3a**<sup>1</sup>H NMR

300 MHz

CDCl<sub>3</sub>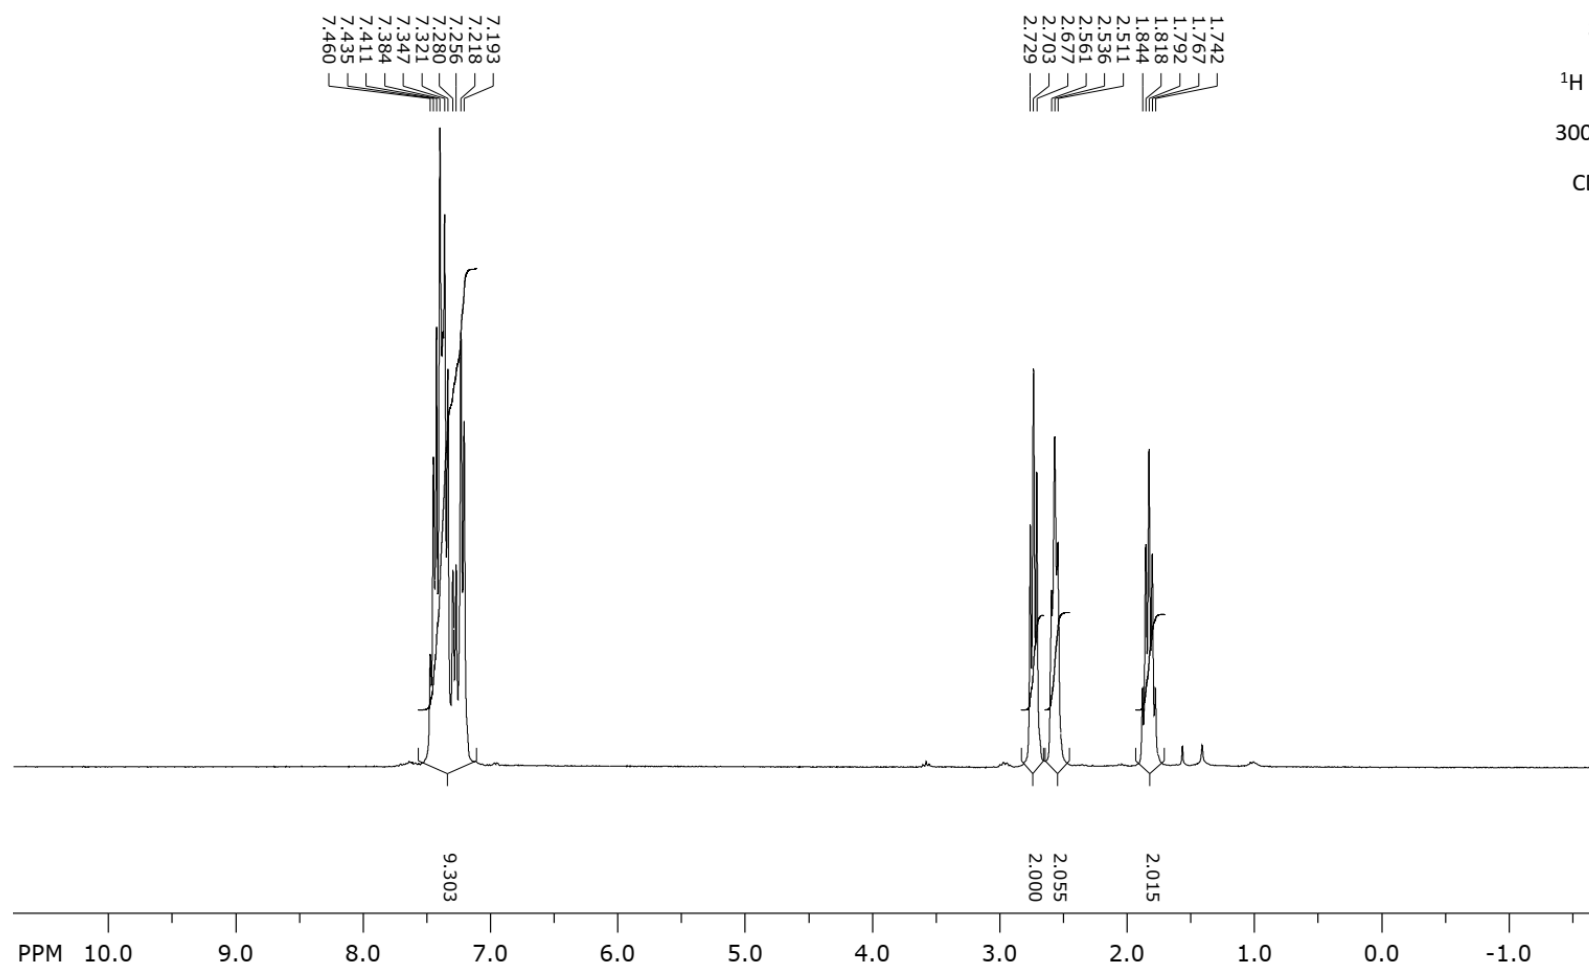

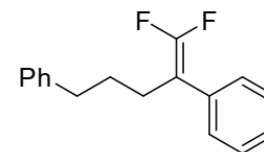**3a** $^{13}\text{C}\{^1\text{H}\}$  NMR

75 MHz

 $\text{CDCl}_3$ 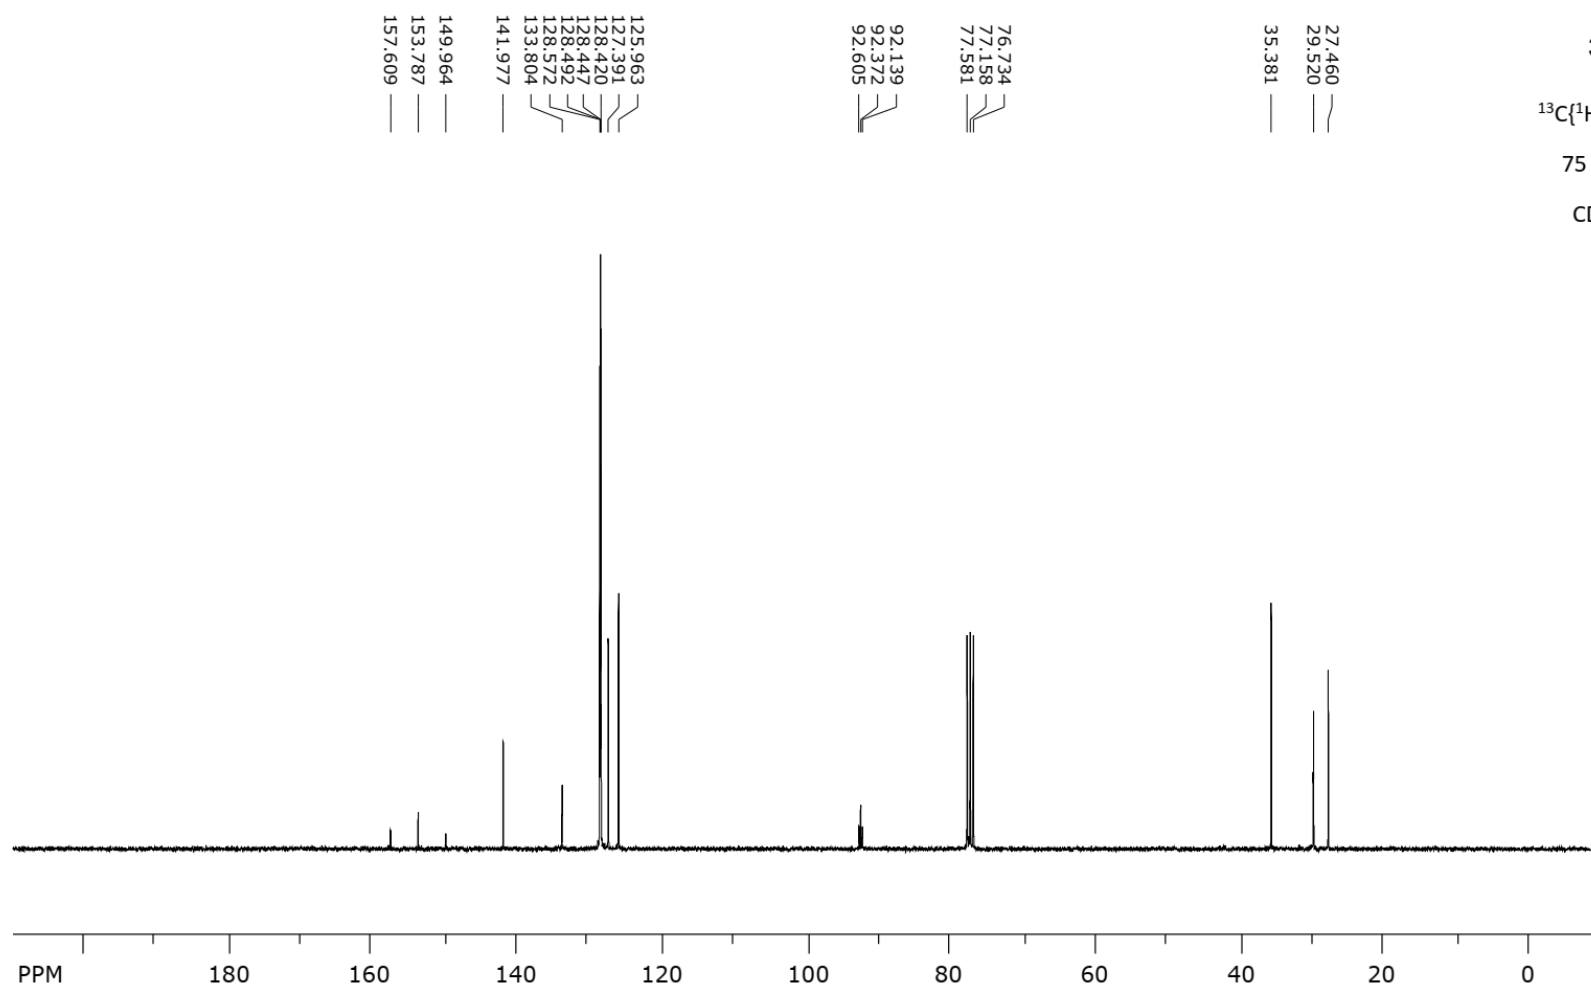

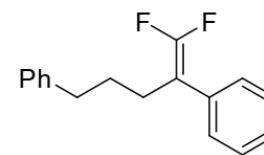**3a**<sup>19</sup>F NMR

282 MHz

CDCl<sub>3</sub>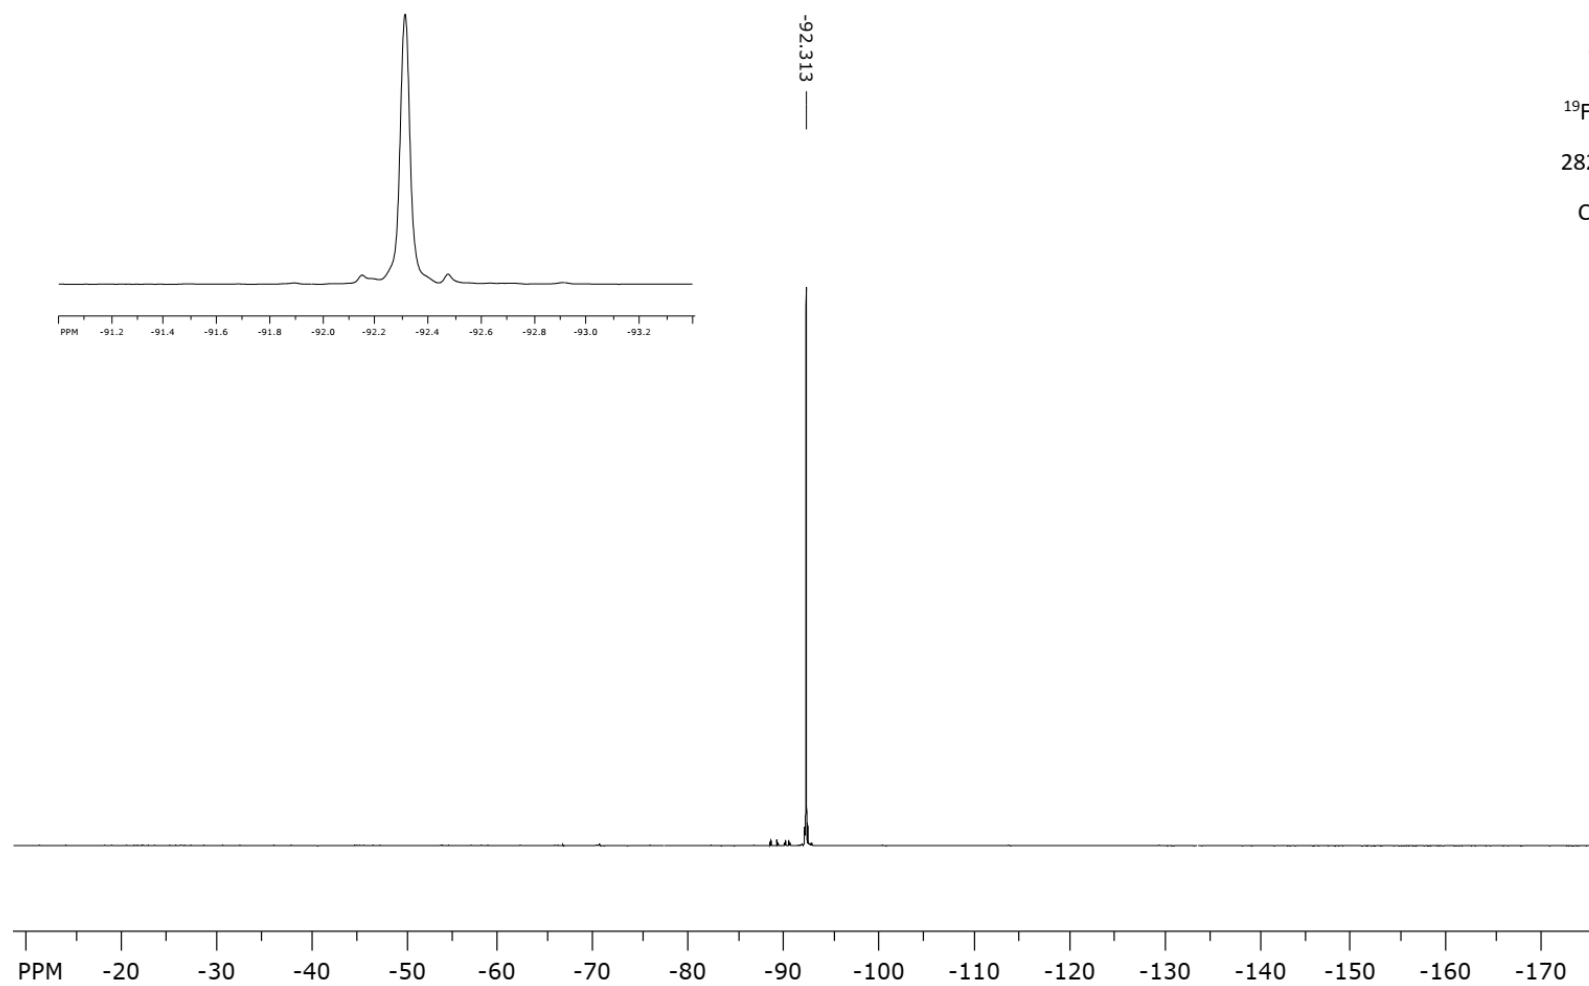

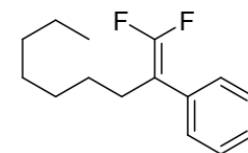**3b**<sup>1</sup>H NMR

300 MHz

CDCl<sub>3</sub>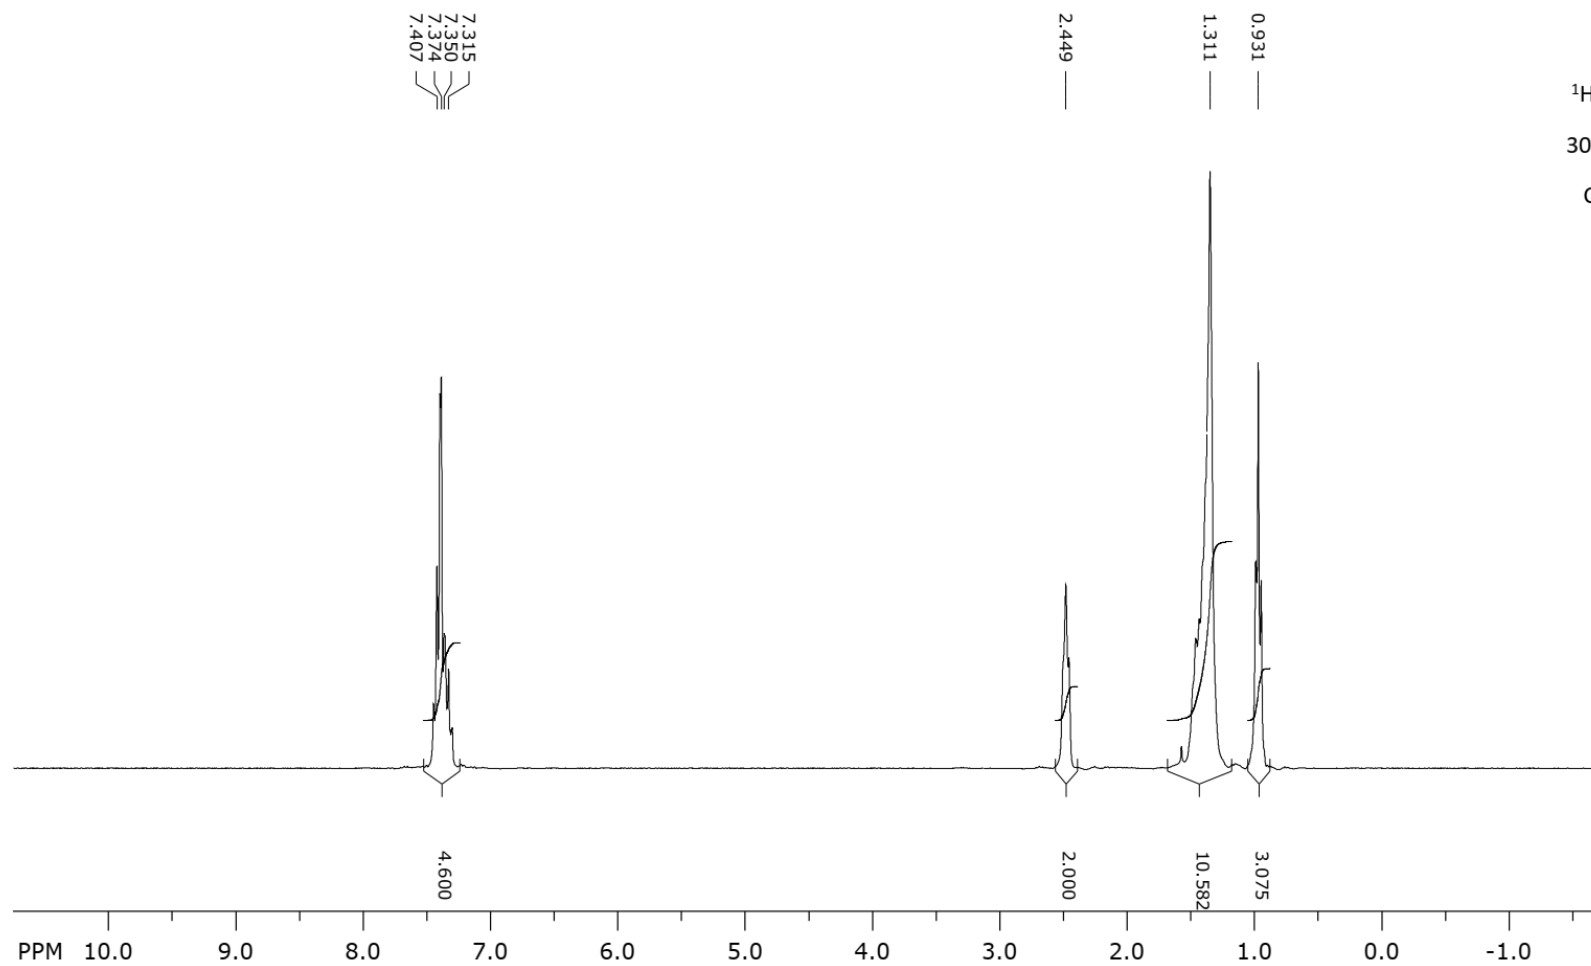

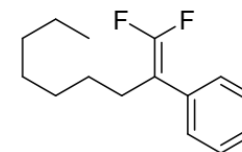**3b** $^{13}\text{C}\{^1\text{H}\}$  NMR

75 MHz

 $\text{CDCl}_3$ 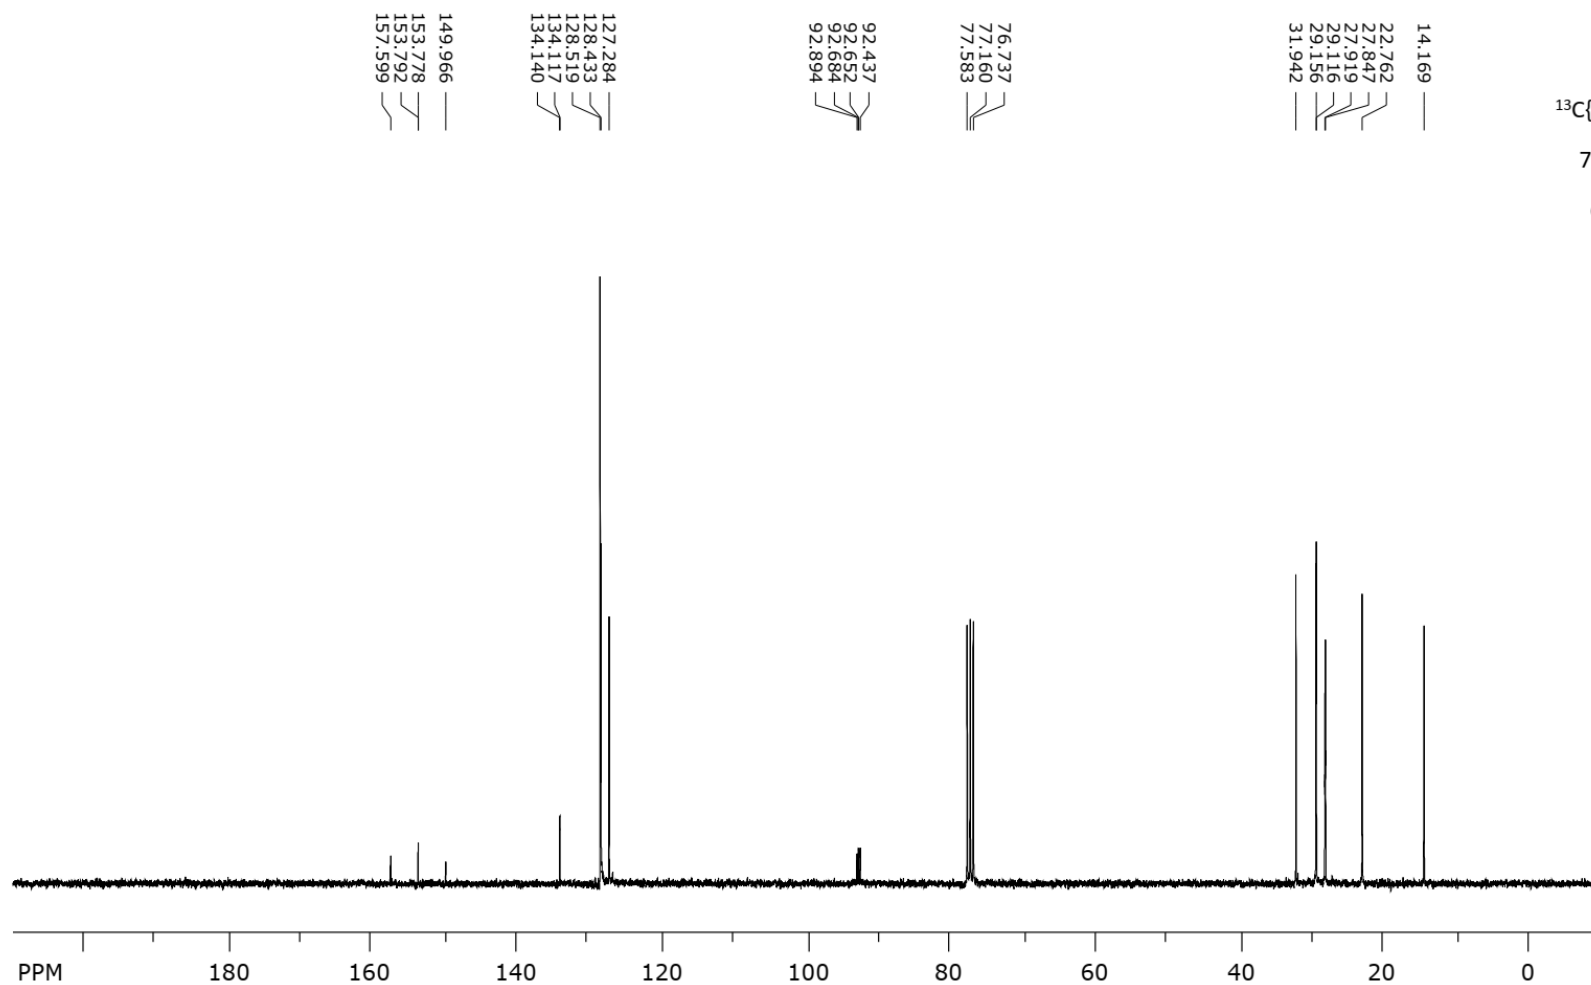

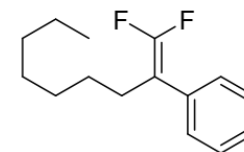**3b**<sup>19</sup>F NMR

282 MHz

CDCl<sub>3</sub>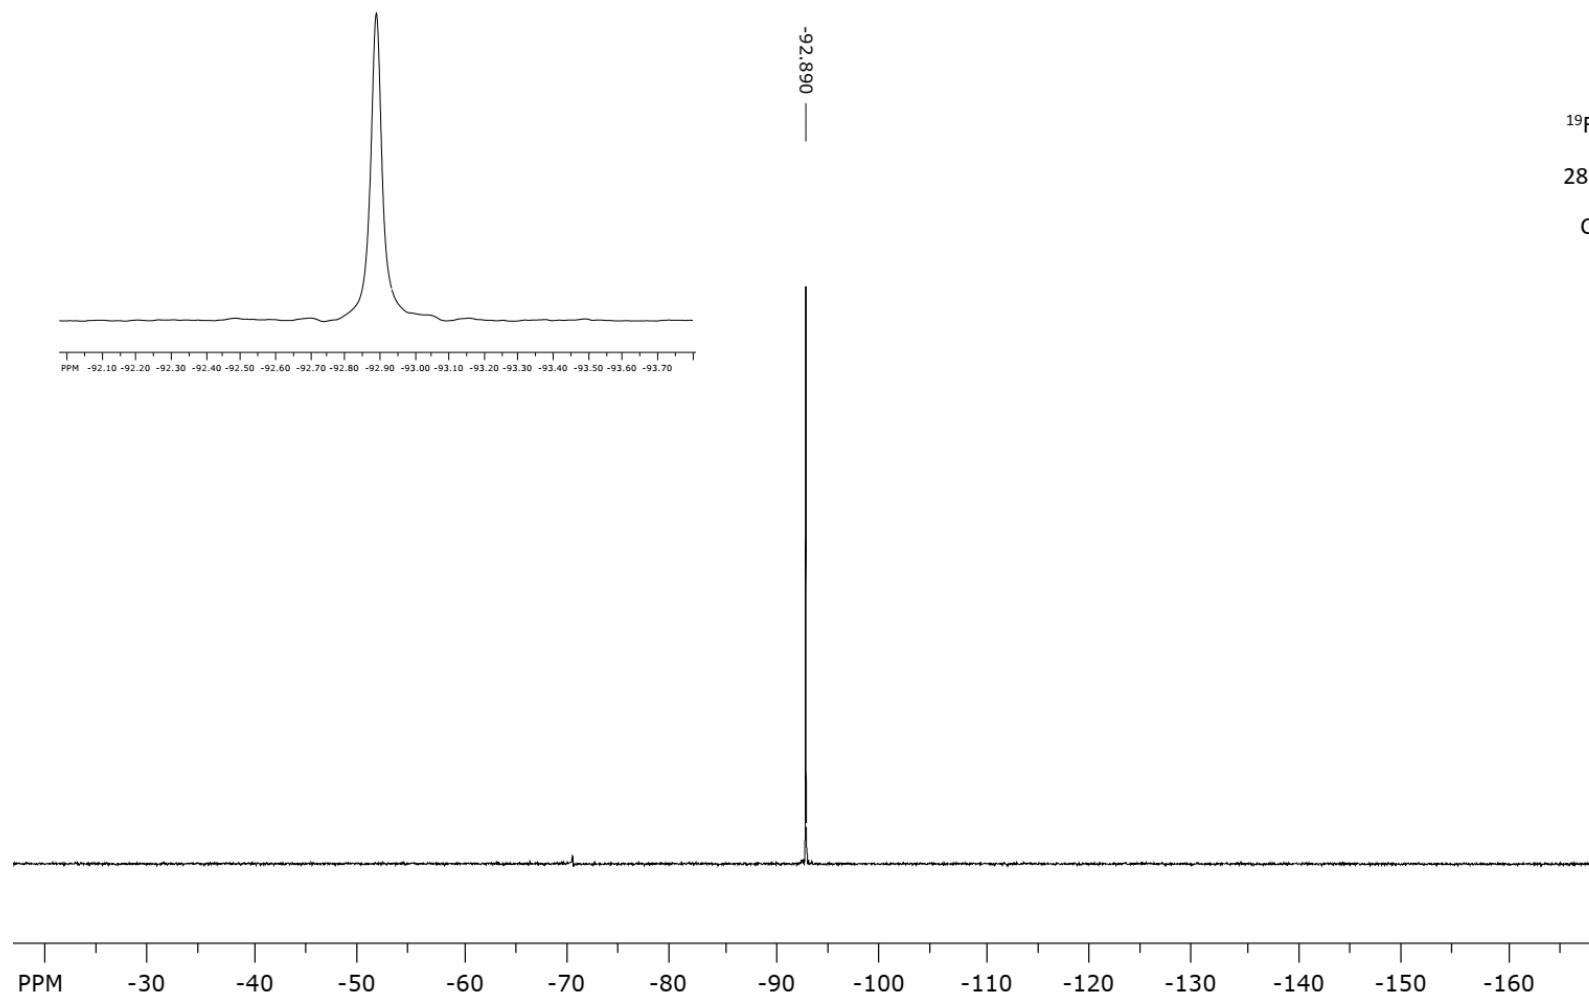

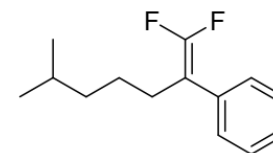**3c**<sup>1</sup>H NMR

300 MHz

CDCl<sub>3</sub>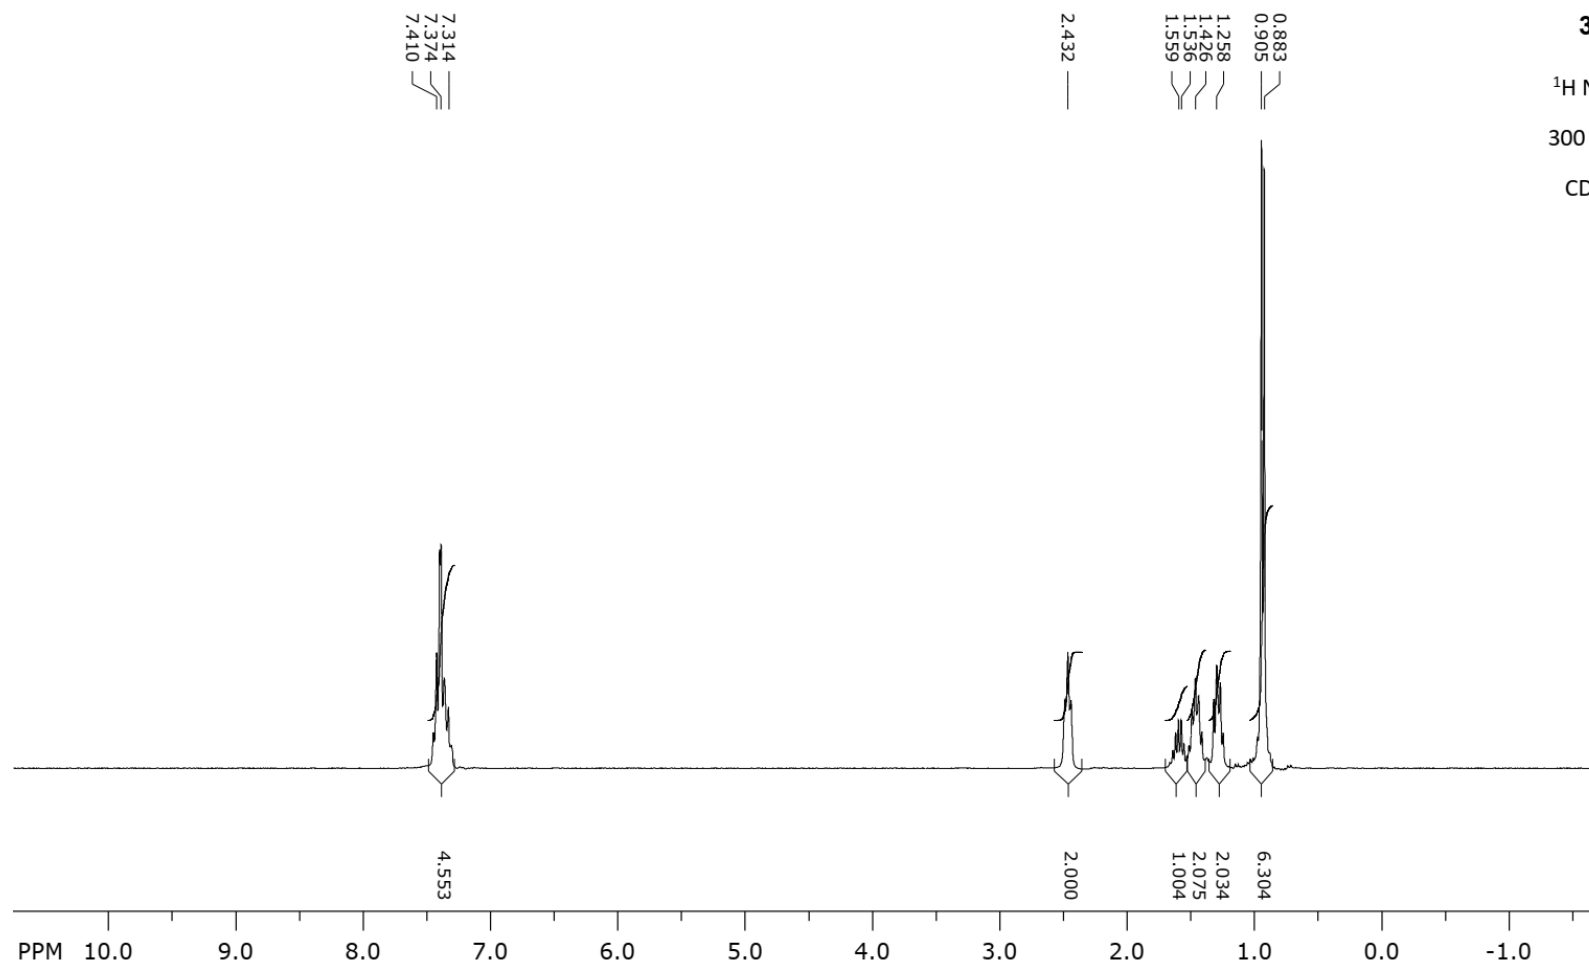



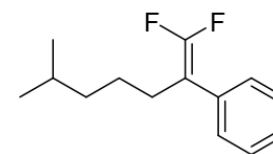**3c** $^{13}\text{C}\{^1\text{H}\}$  NMR

75 MHz

 $\text{CDCl}_3$ 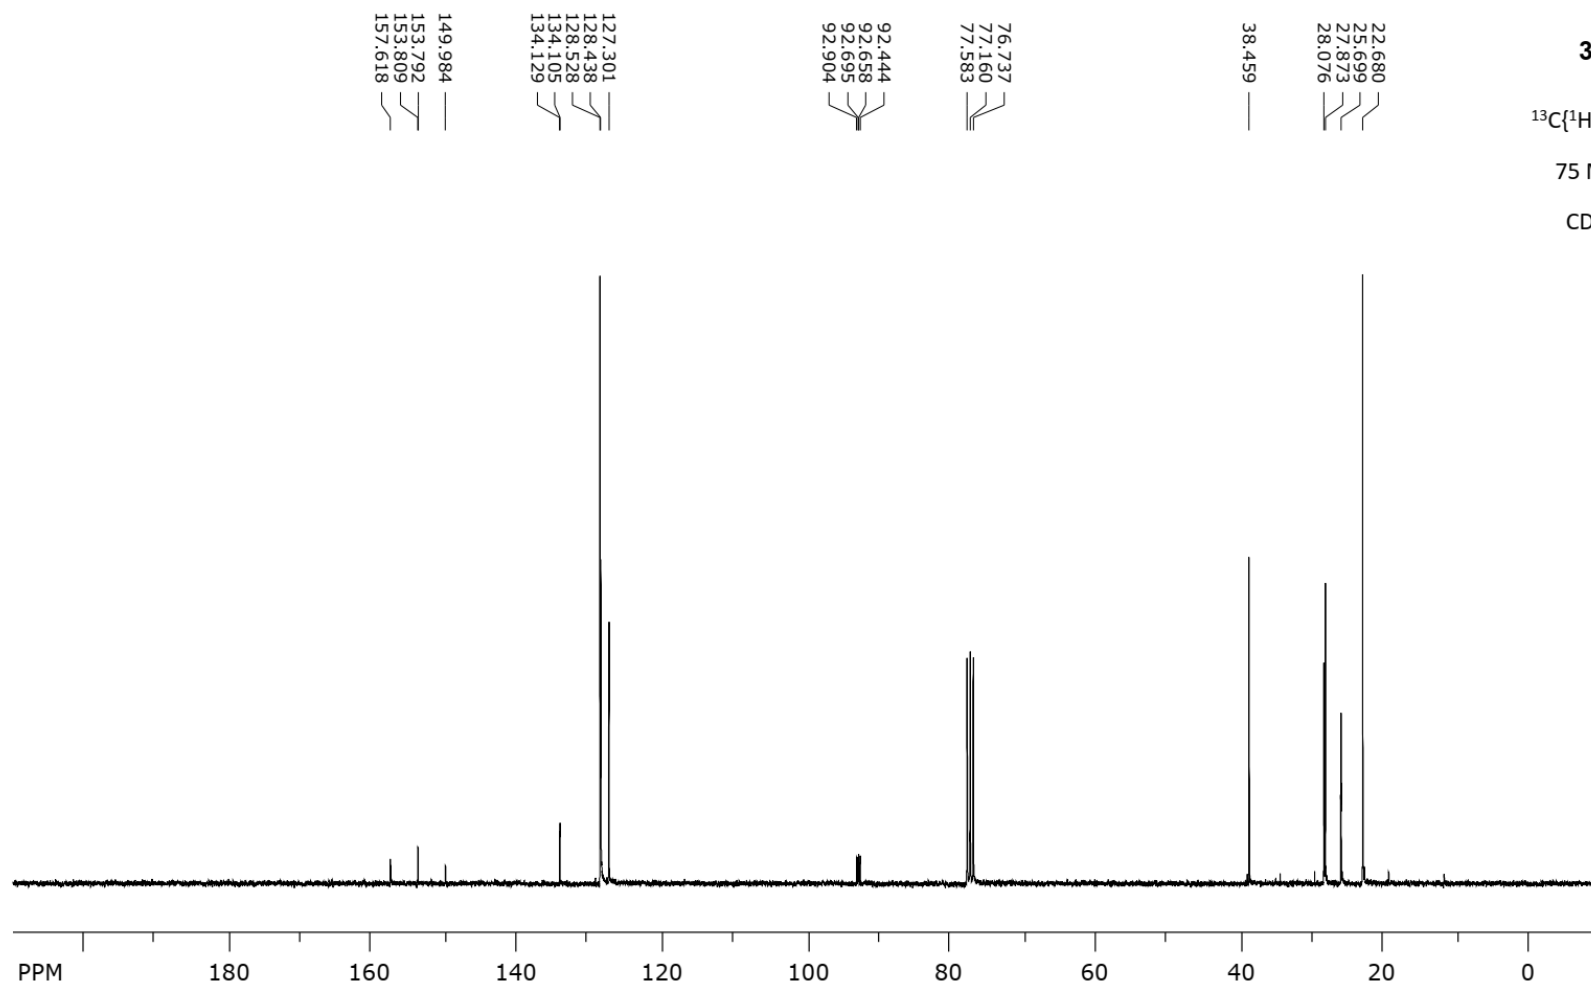

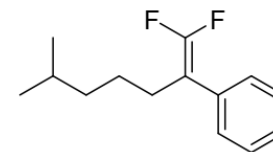**3c**<sup>19</sup>F NMR

282 MHz

CDCl<sub>3</sub>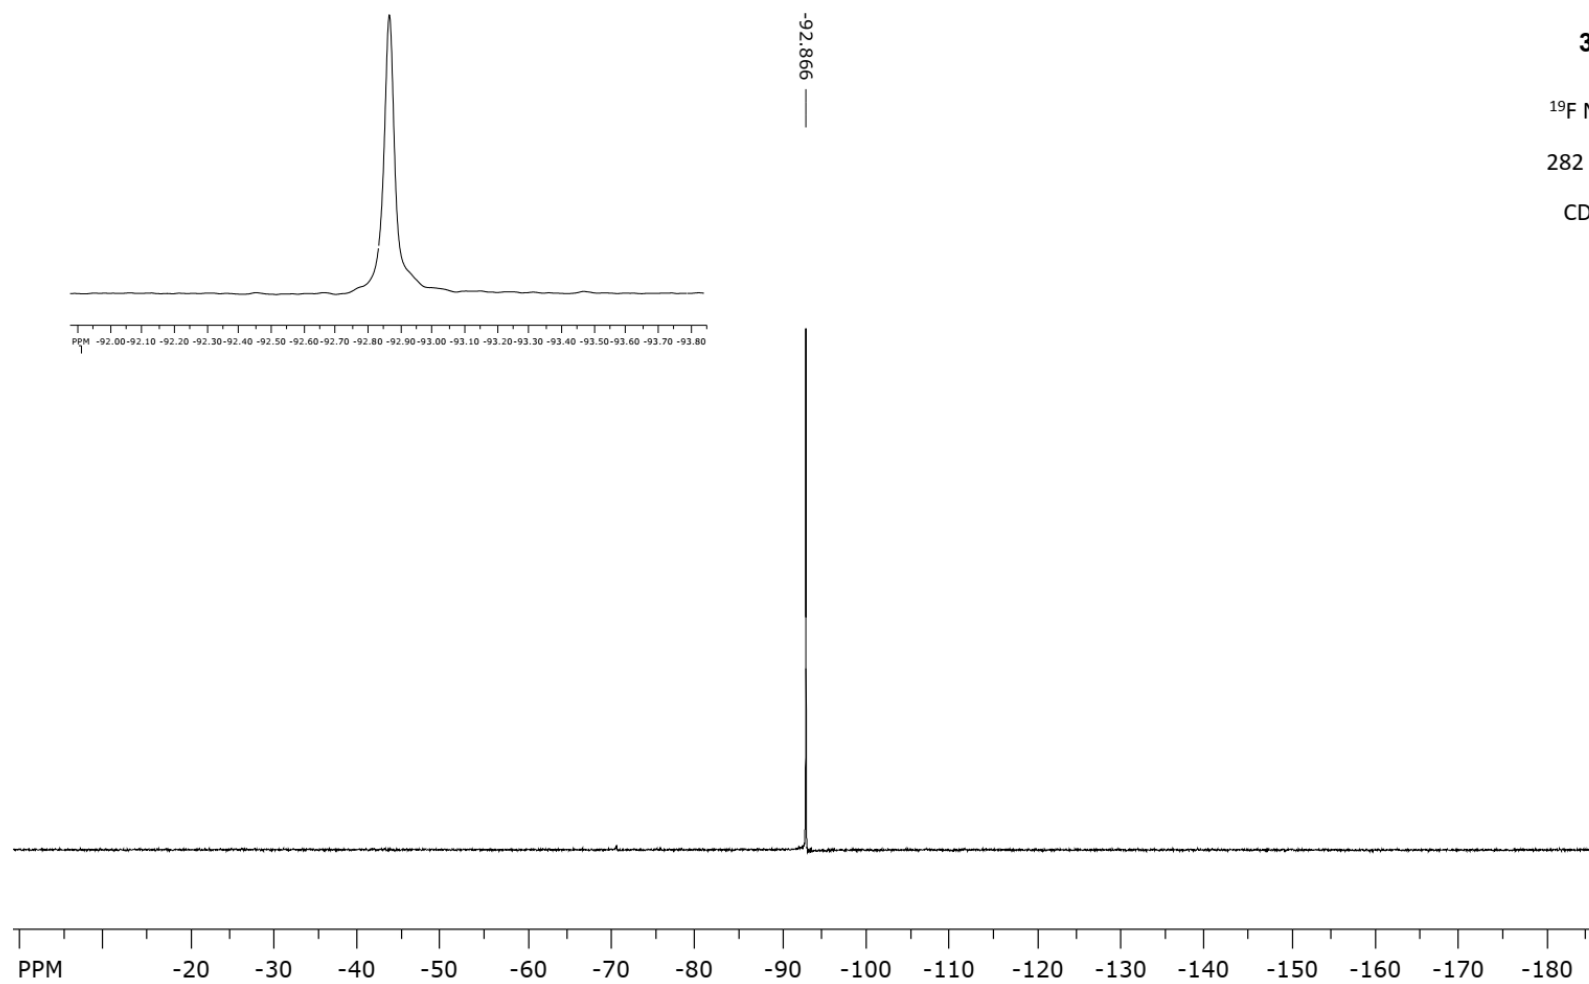

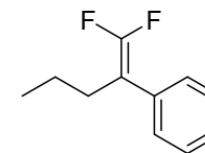**3d**<sup>1</sup>H NMR

300 MHz

CDCl<sub>3</sub>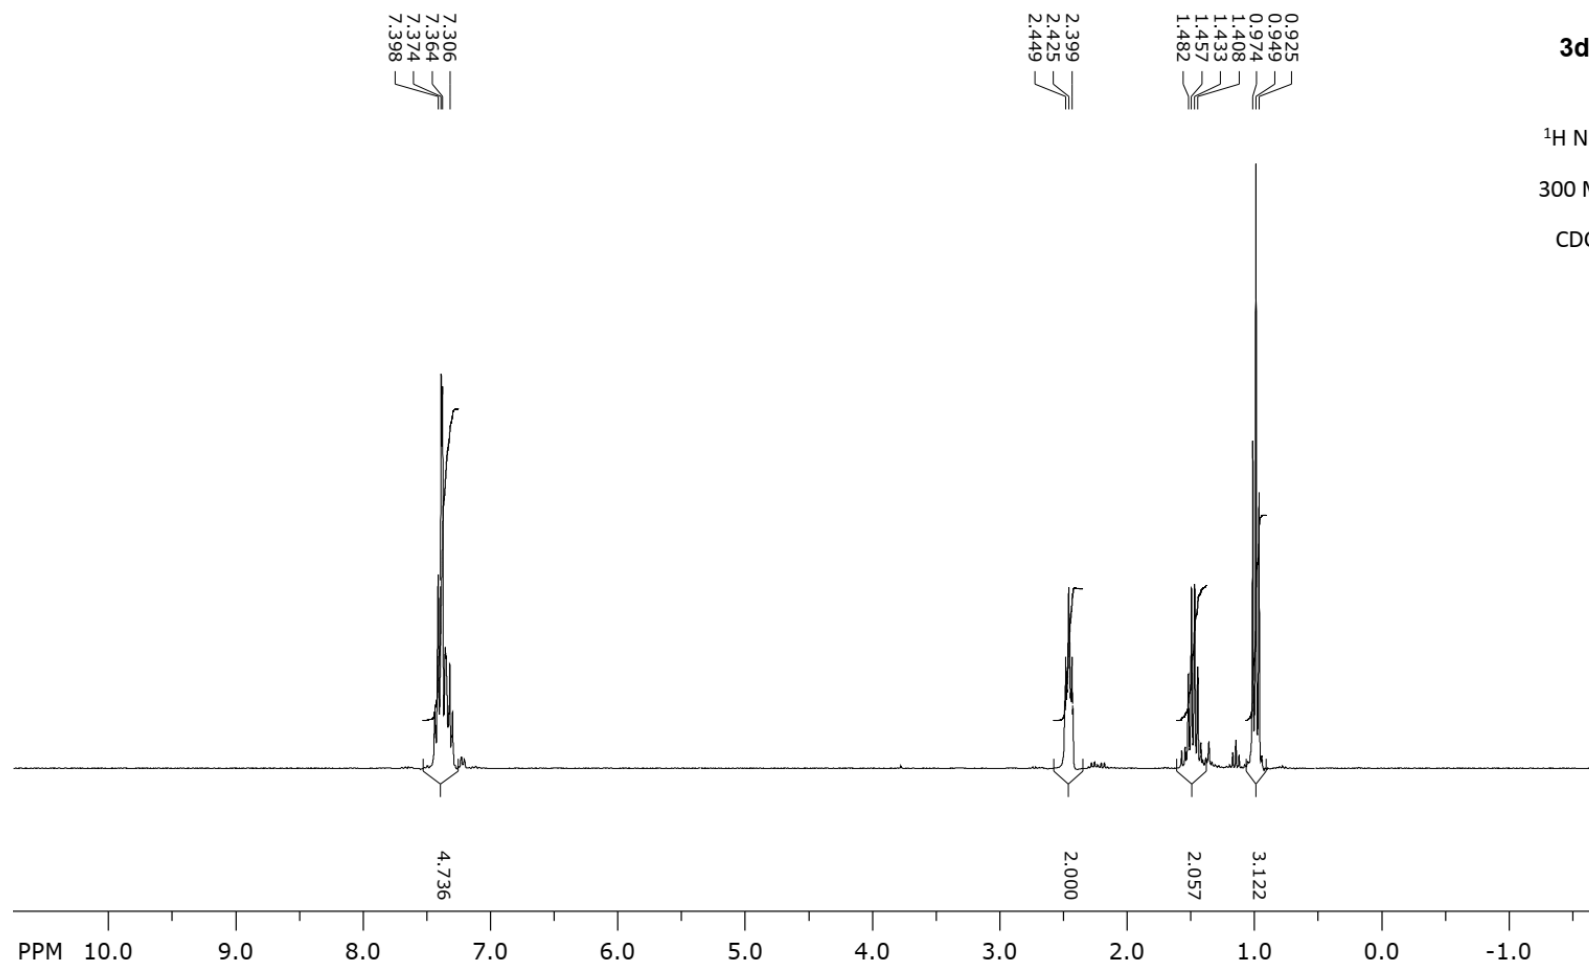

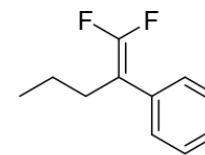**3d** $^{13}\text{C}\{^1\text{H}\}$  NMR

75 MHz

 $\text{CDCl}_3$ 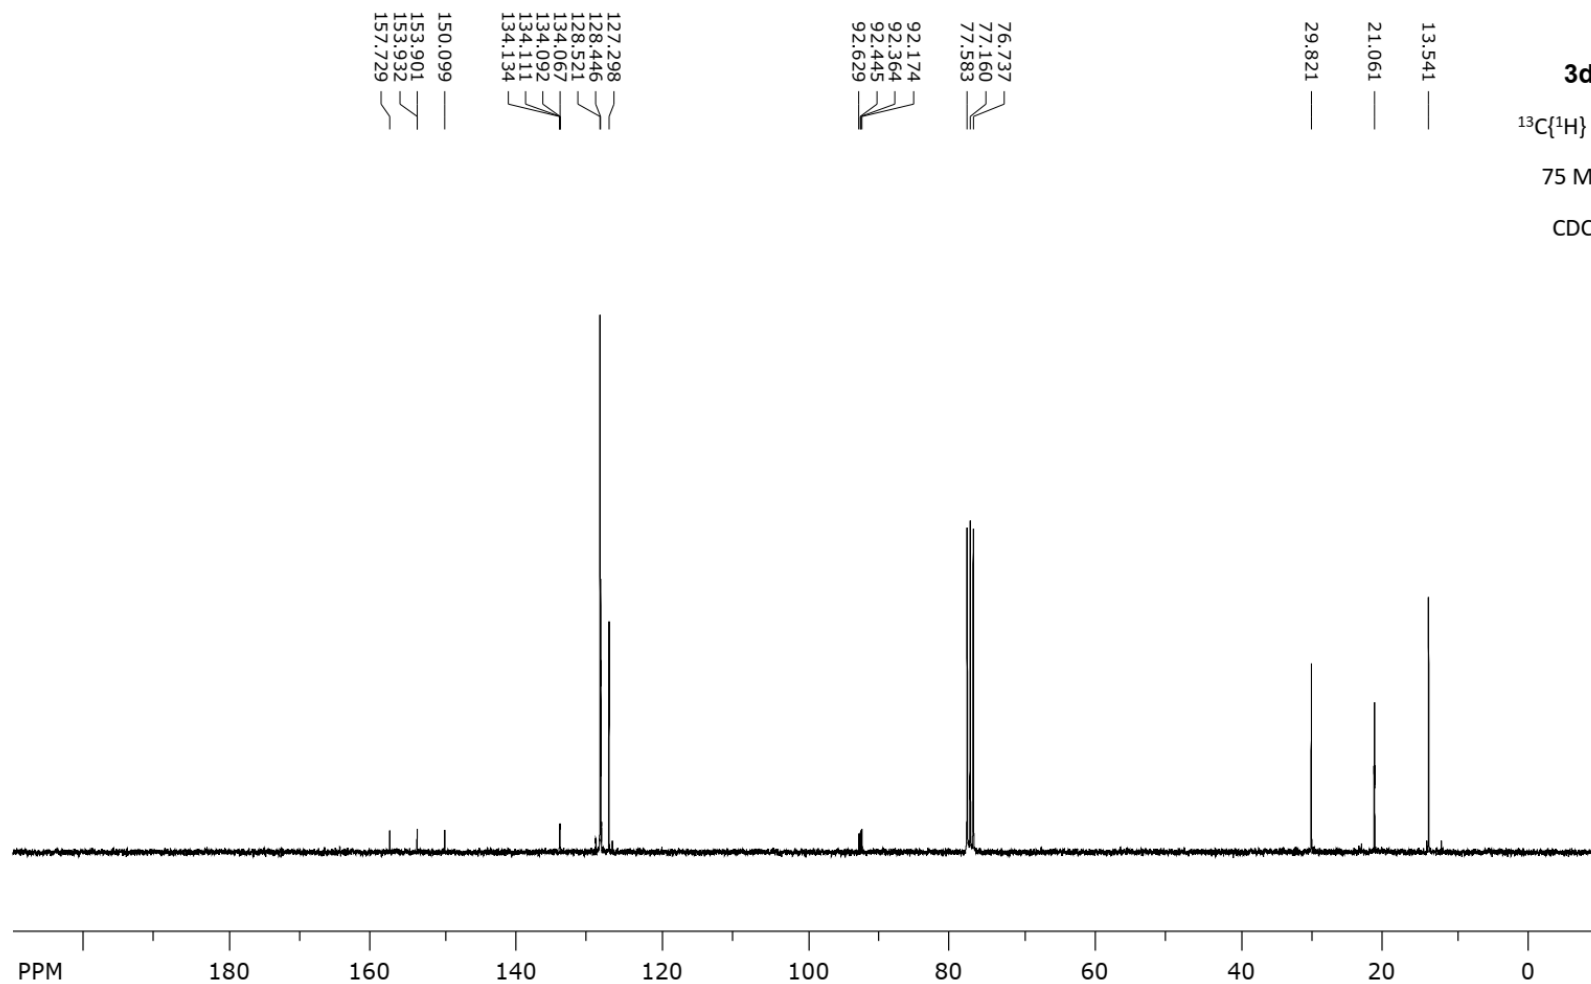

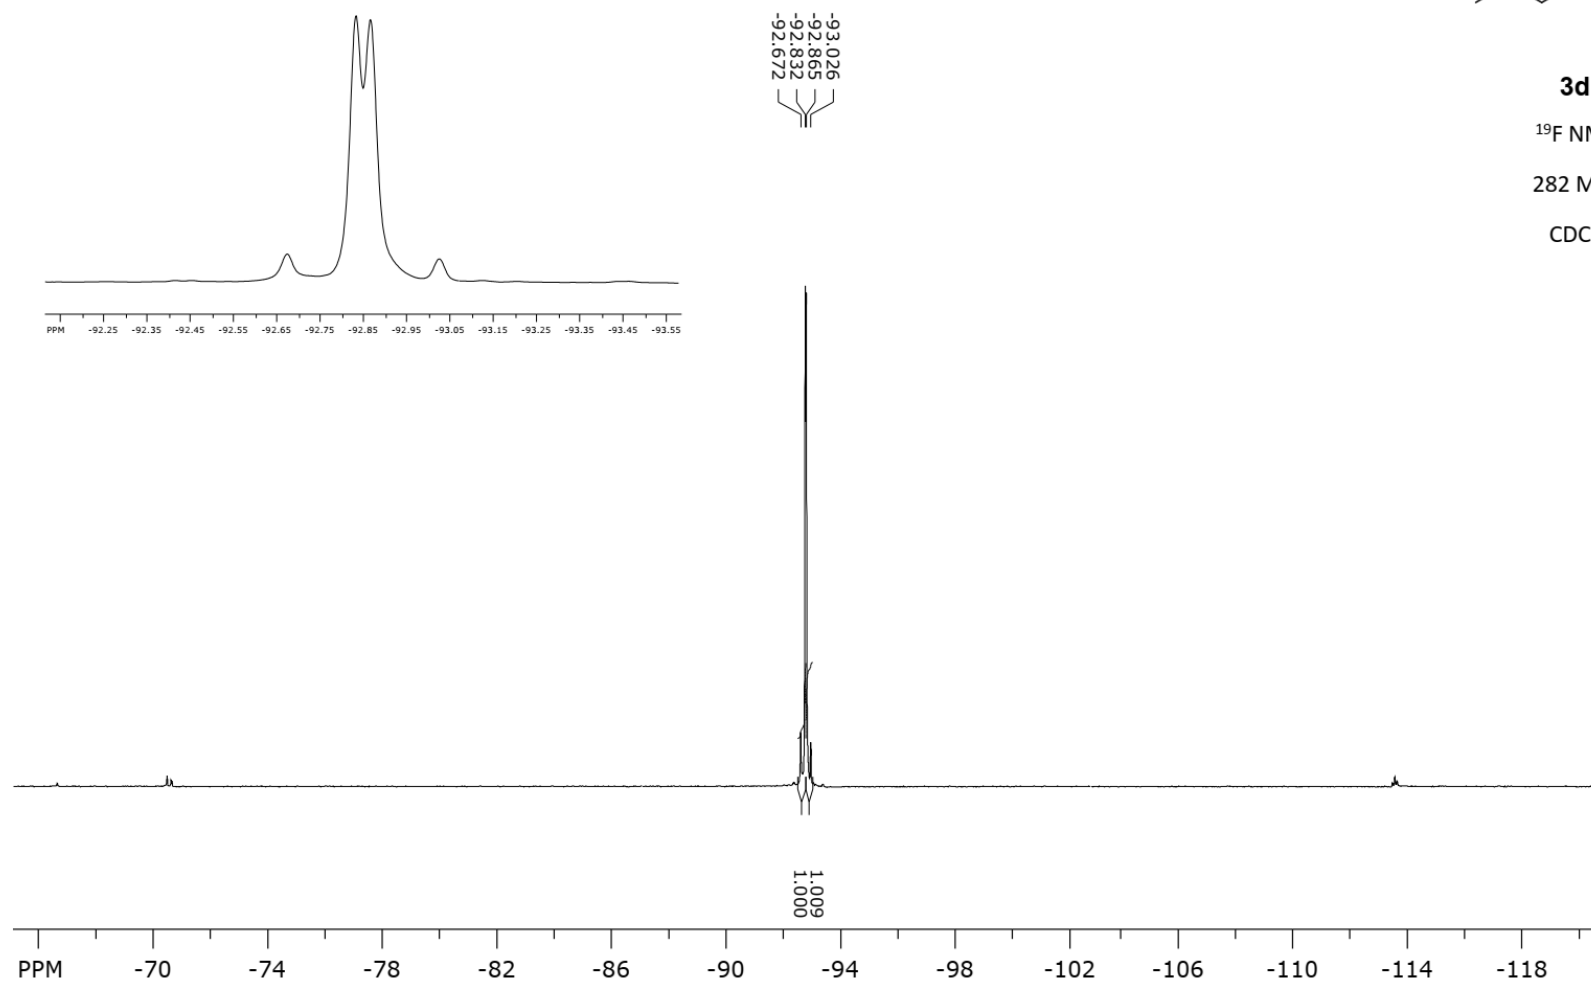

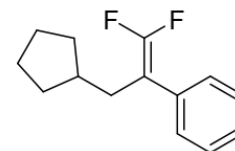**3e**<sup>1</sup>H NMR

300 MHz

CDCl<sub>3</sub>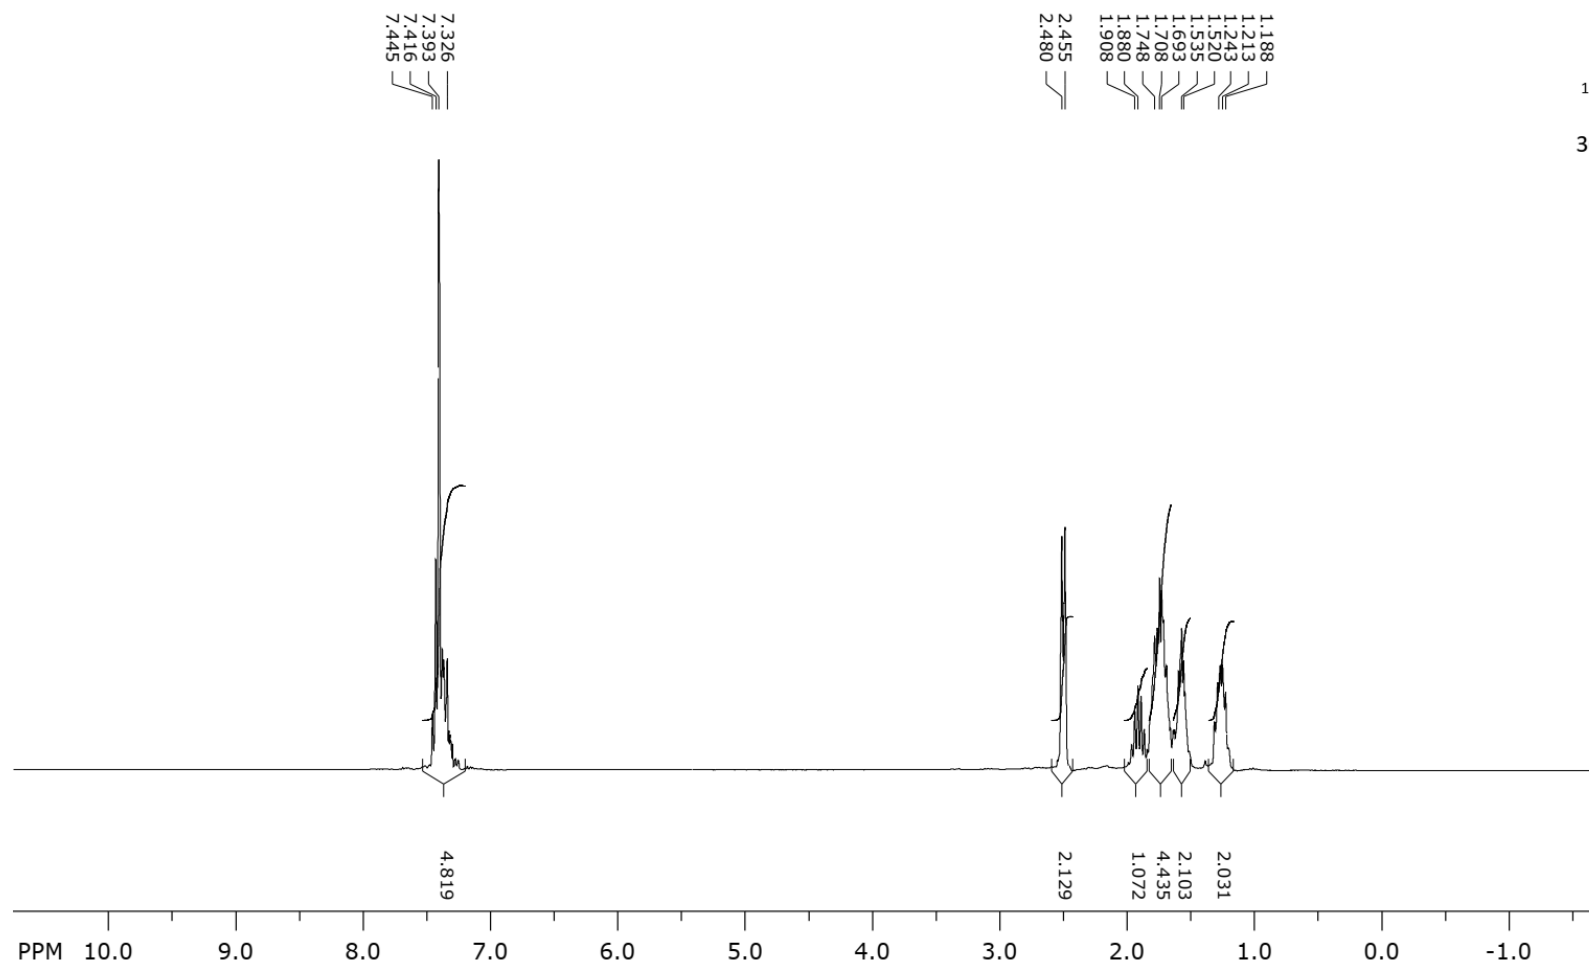

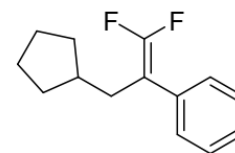**3e** $^{13}\text{C}\{^1\text{H}\}$  NMR

75 MHz

 $\text{CDCl}_3$ 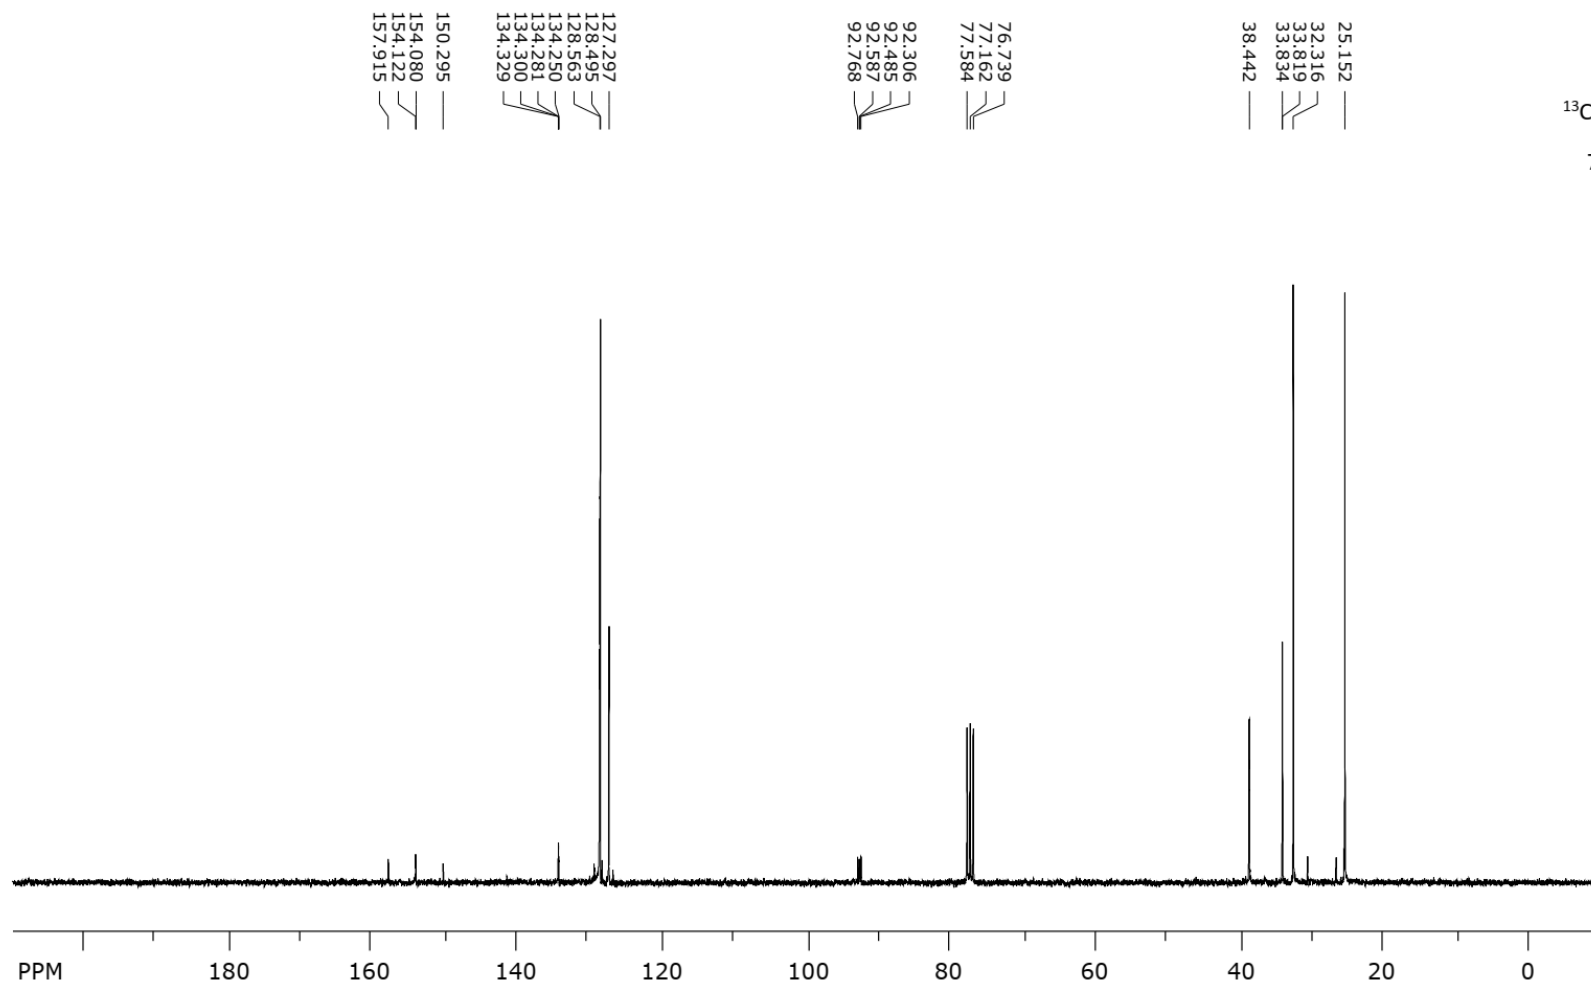

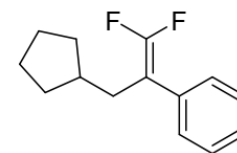**3e**<sup>19</sup>F NMR

282 MHz

CDCl<sub>3</sub>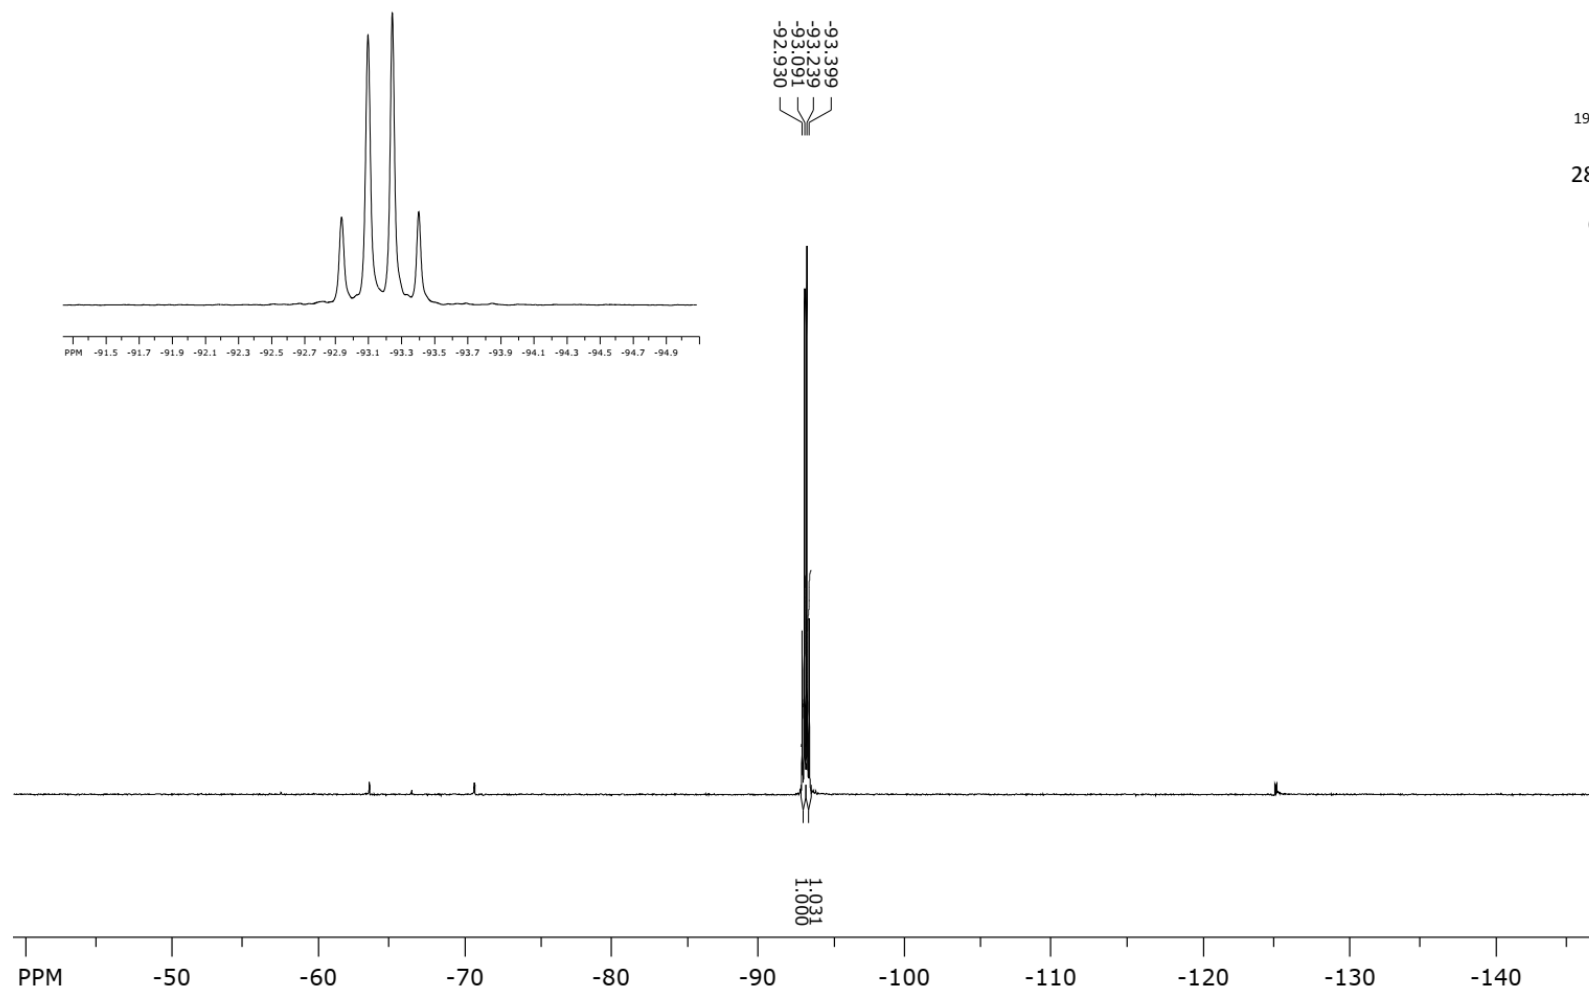



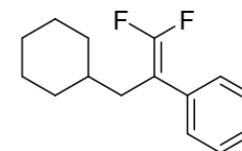**3f**<sup>1</sup>H NMR

300 MHz

CDCl<sub>3</sub>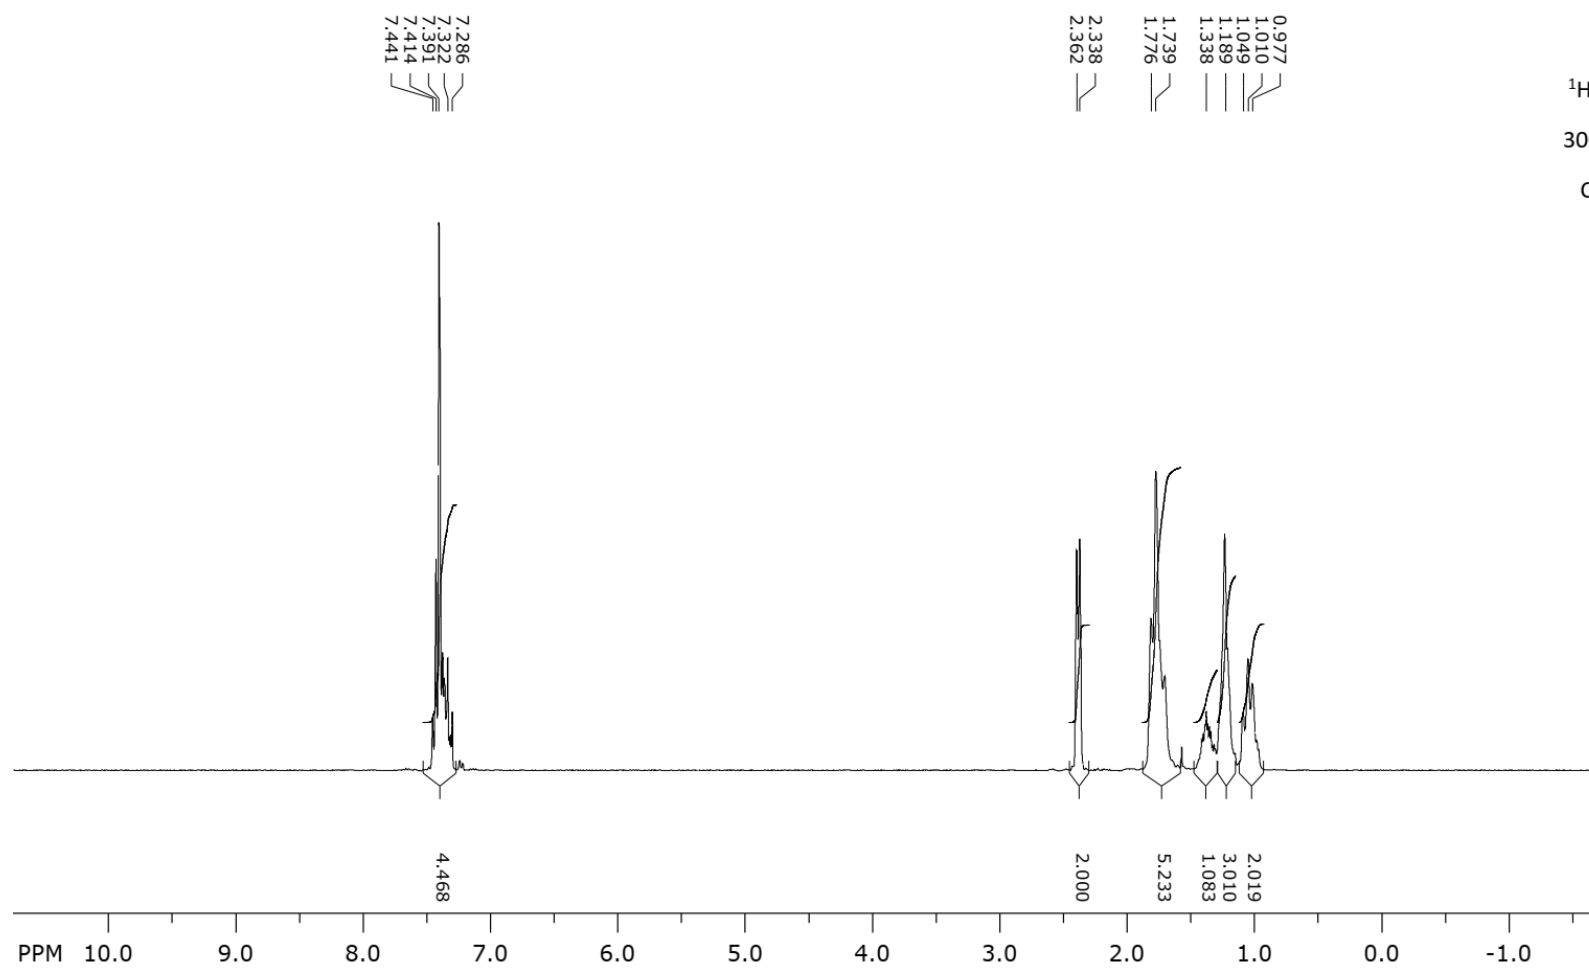

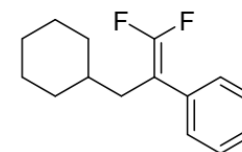**3f** $^{13}\text{C}\{^1\text{H}\}$  NMR

75 MHz

 $\text{CDCl}_3$ 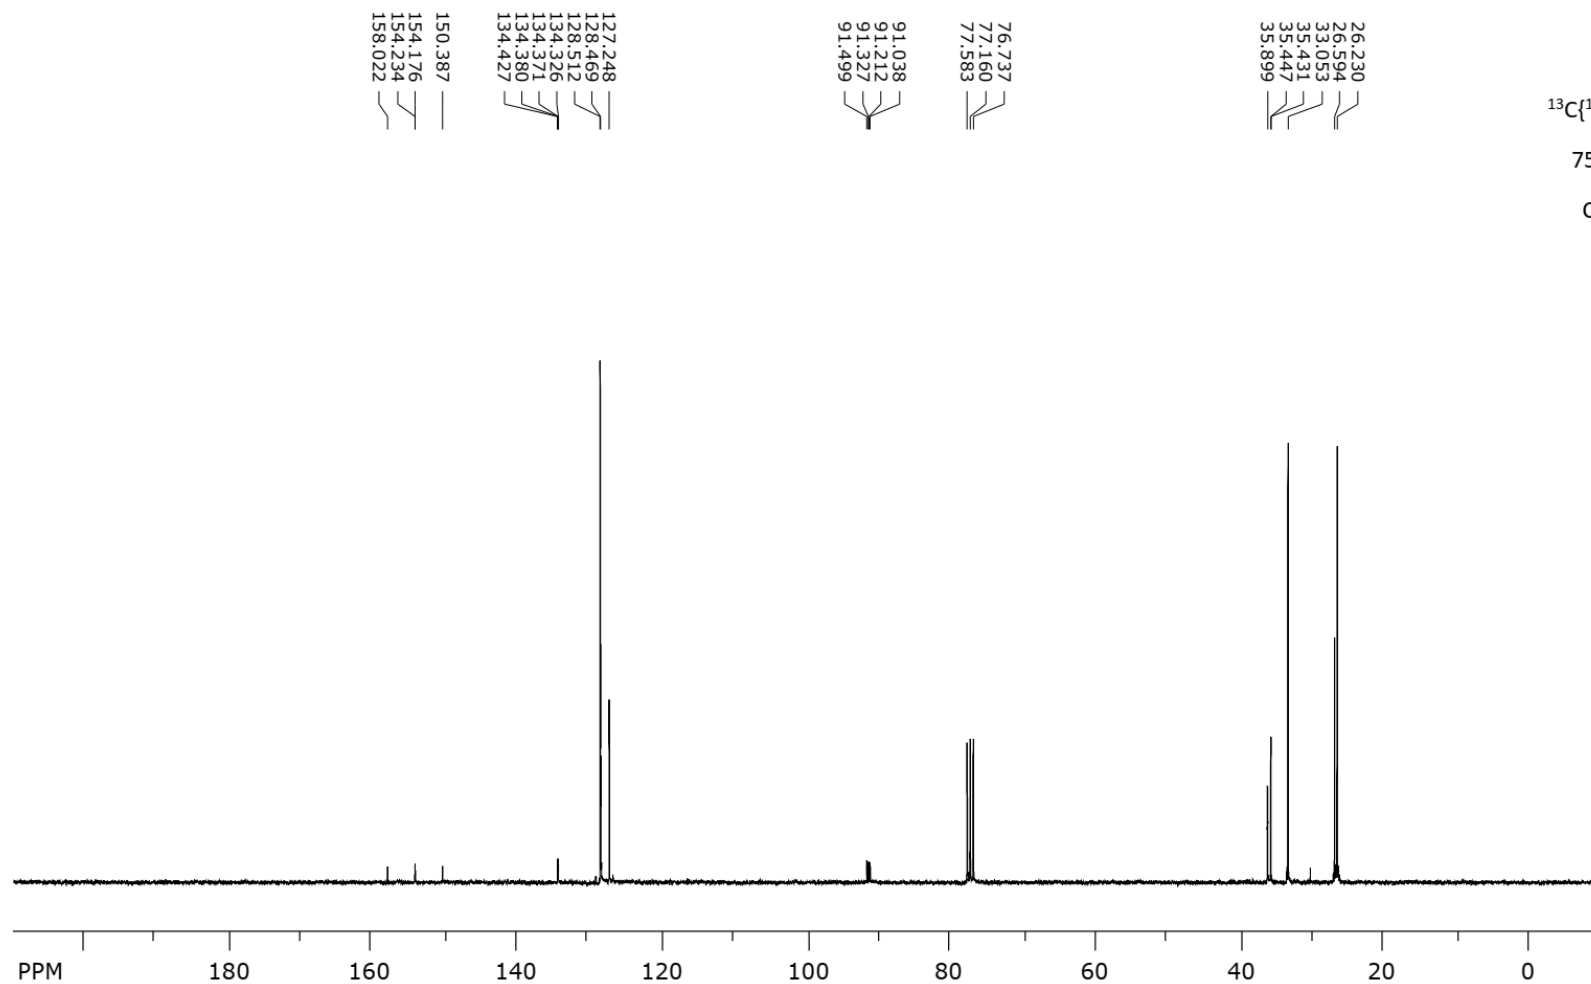

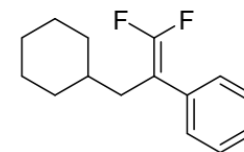**3f**<sup>19</sup>F NMR

282 MHz

CDCl<sub>3</sub>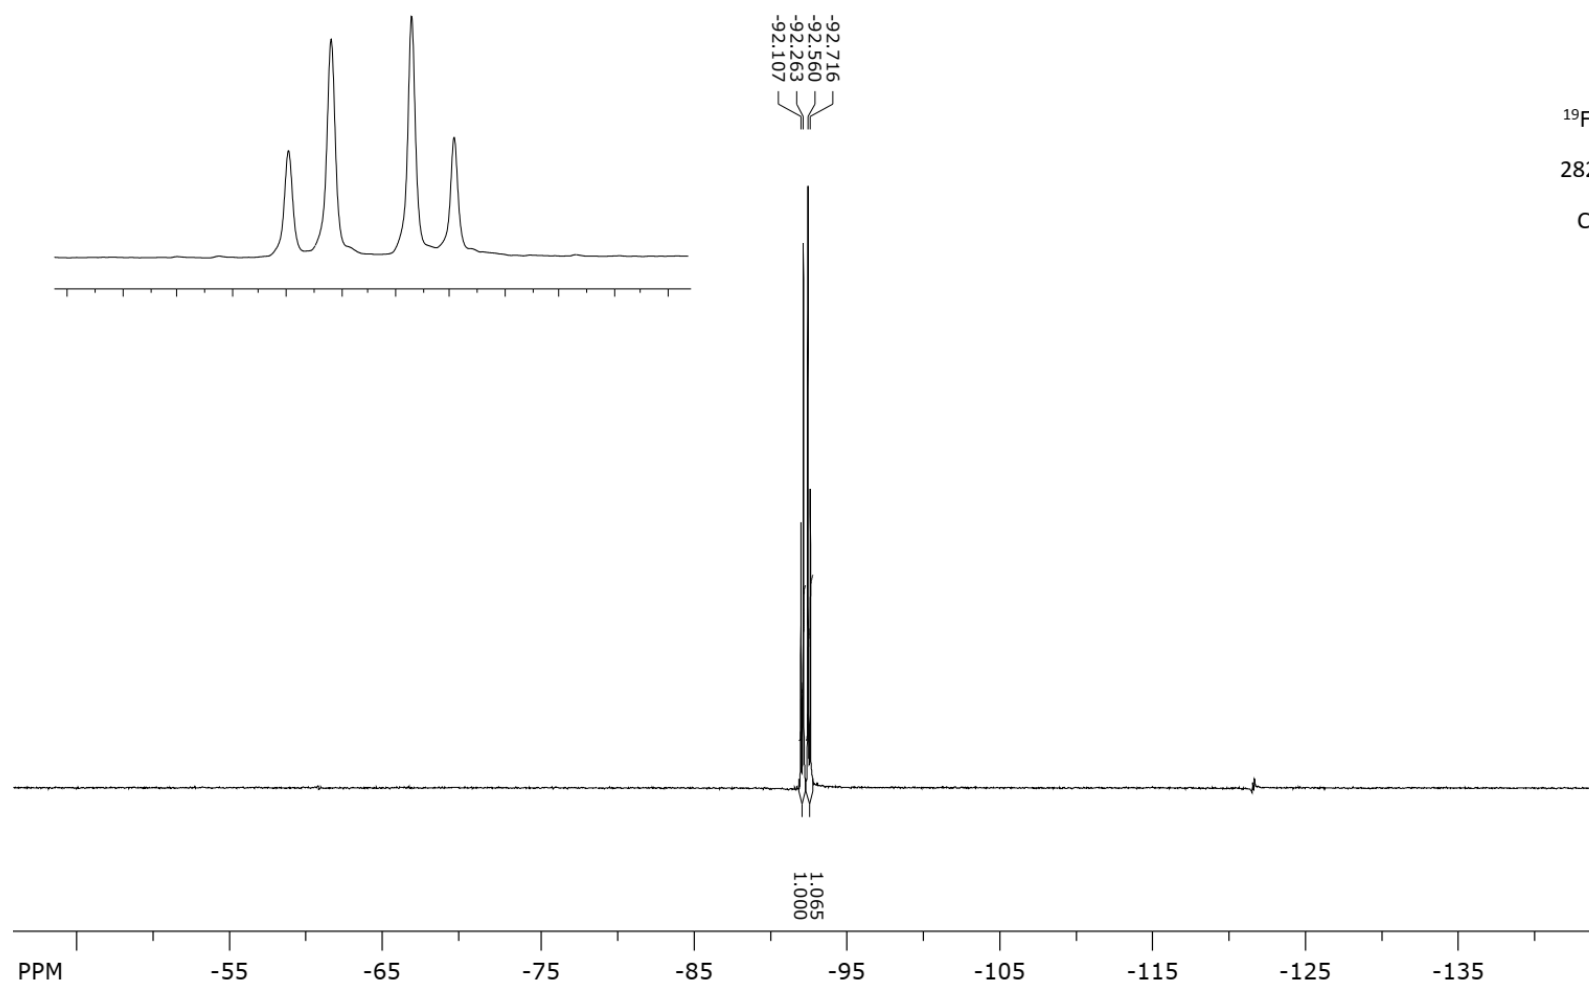

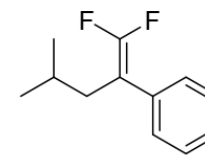**3g**<sup>1</sup>H NMR

300 MHz

CDCl<sub>3</sub>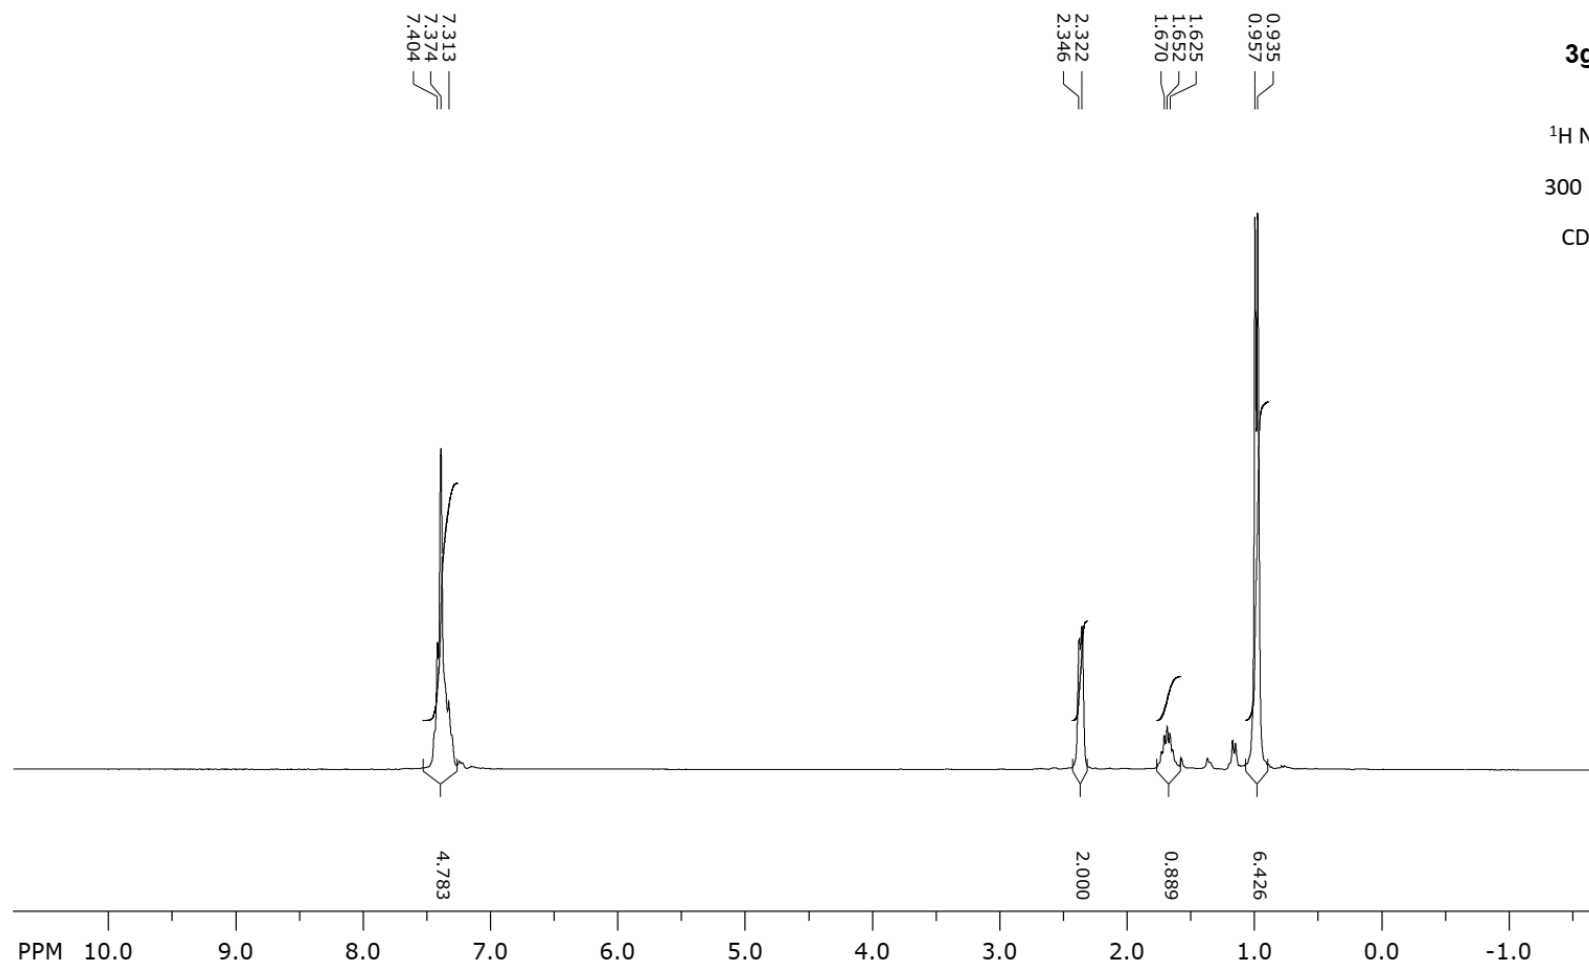

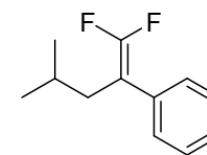**3g** $^{13}\text{C}\{^1\text{H}\}$  NMR

75 MHz

 $\text{CDCl}_3$ 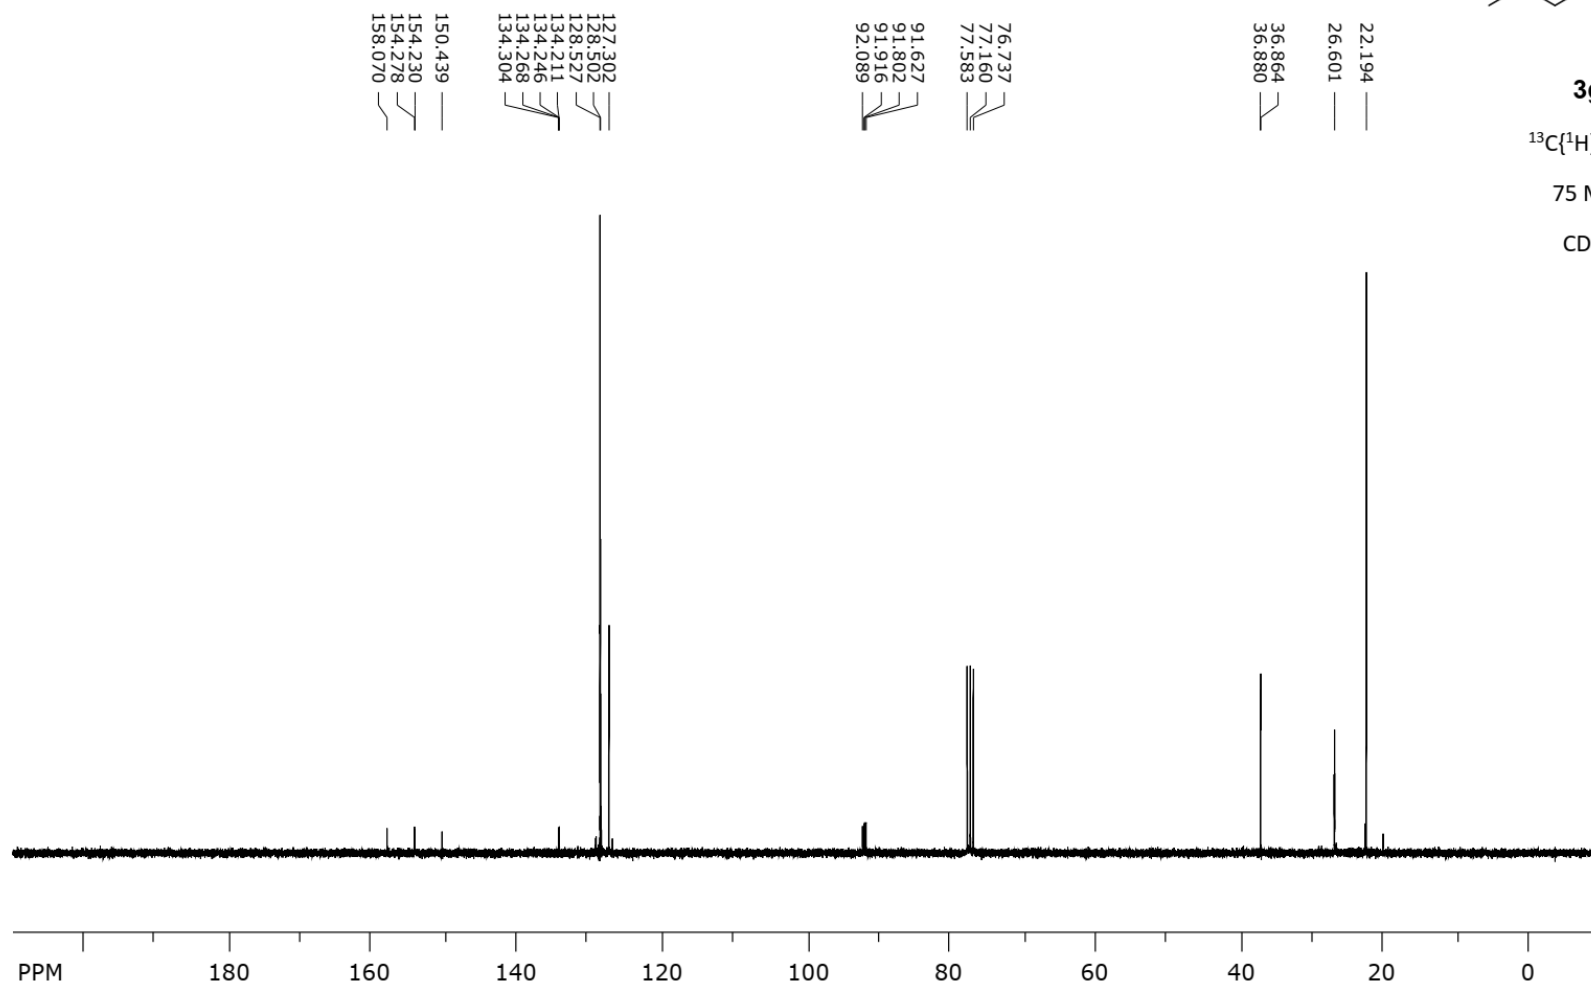

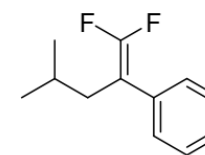**3g**<sup>19</sup>F NMR

282 MHz

CDCl<sub>3</sub>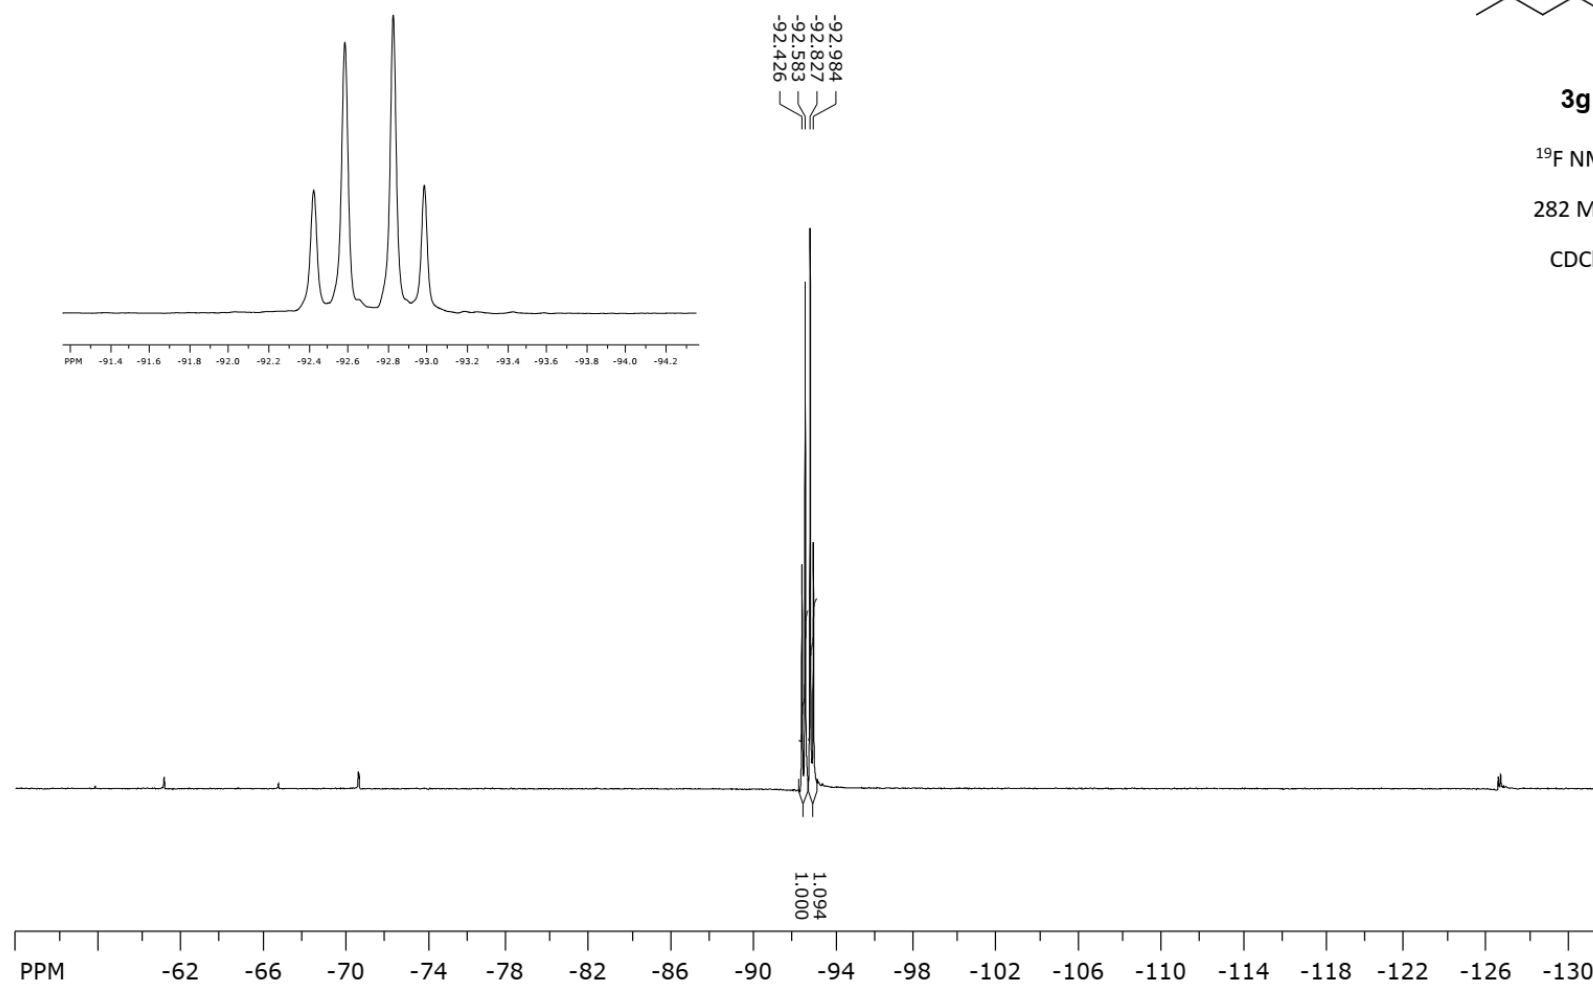

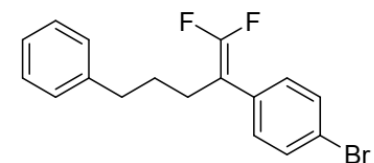<sup>1</sup>H NMR

300 MHz

CDCl<sub>3</sub>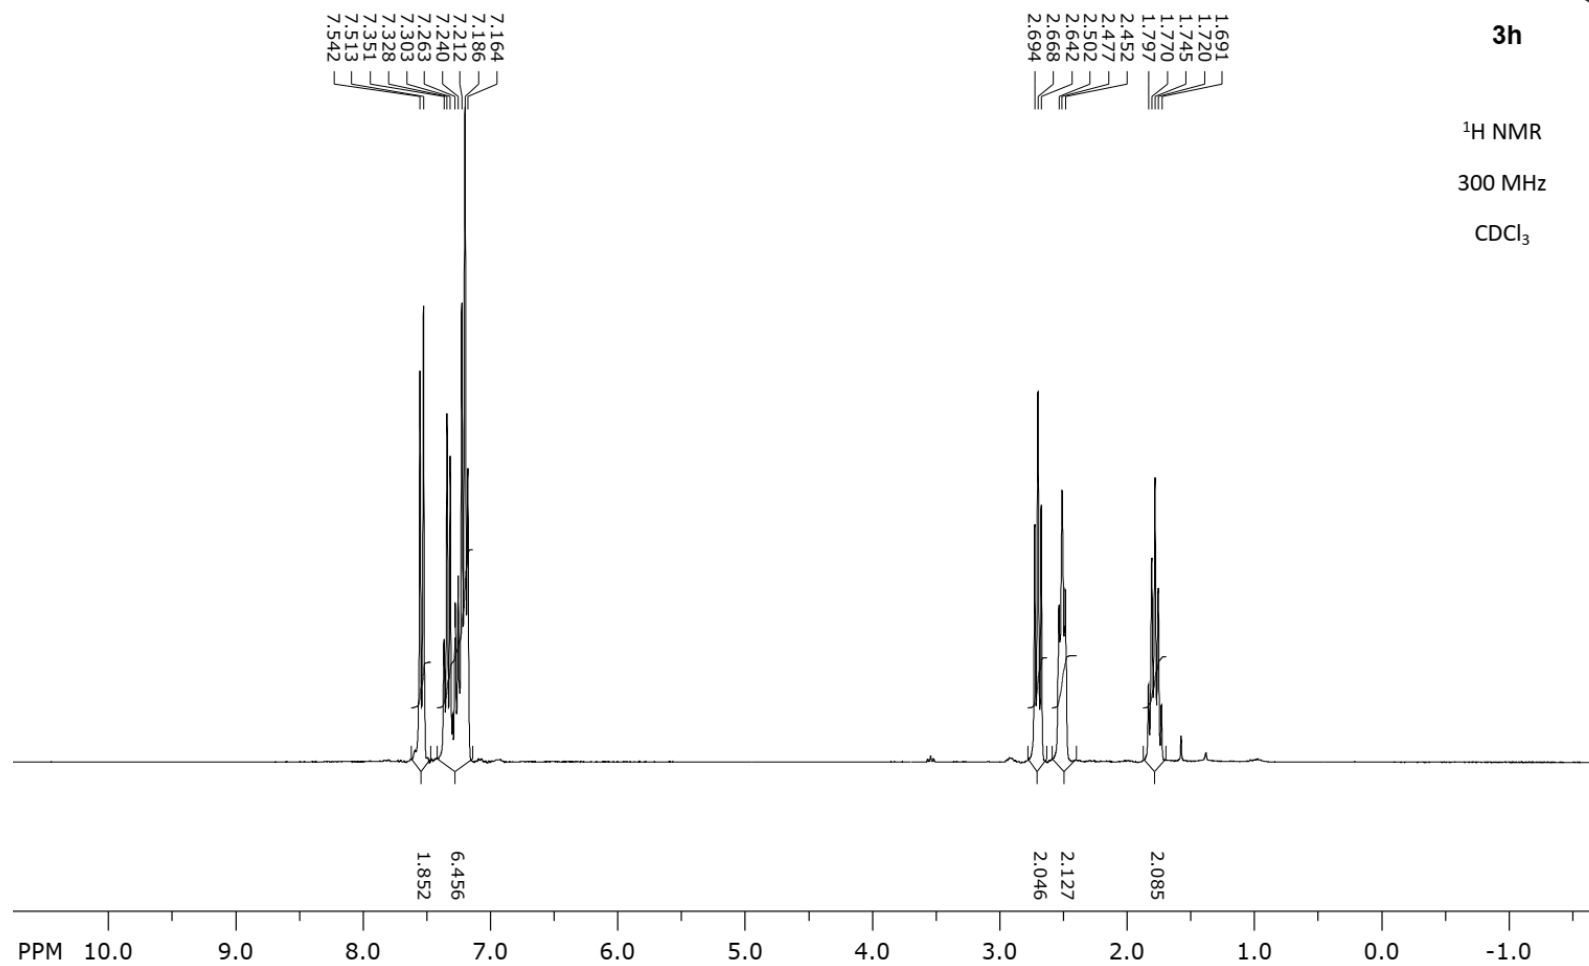

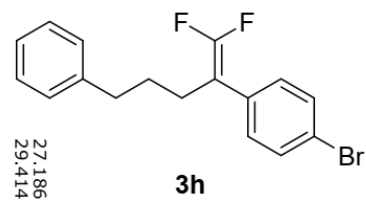 $^{13}\text{C}\{^1\text{H}\}$  NMR

75 MHz

 $\text{CDCl}_3$ 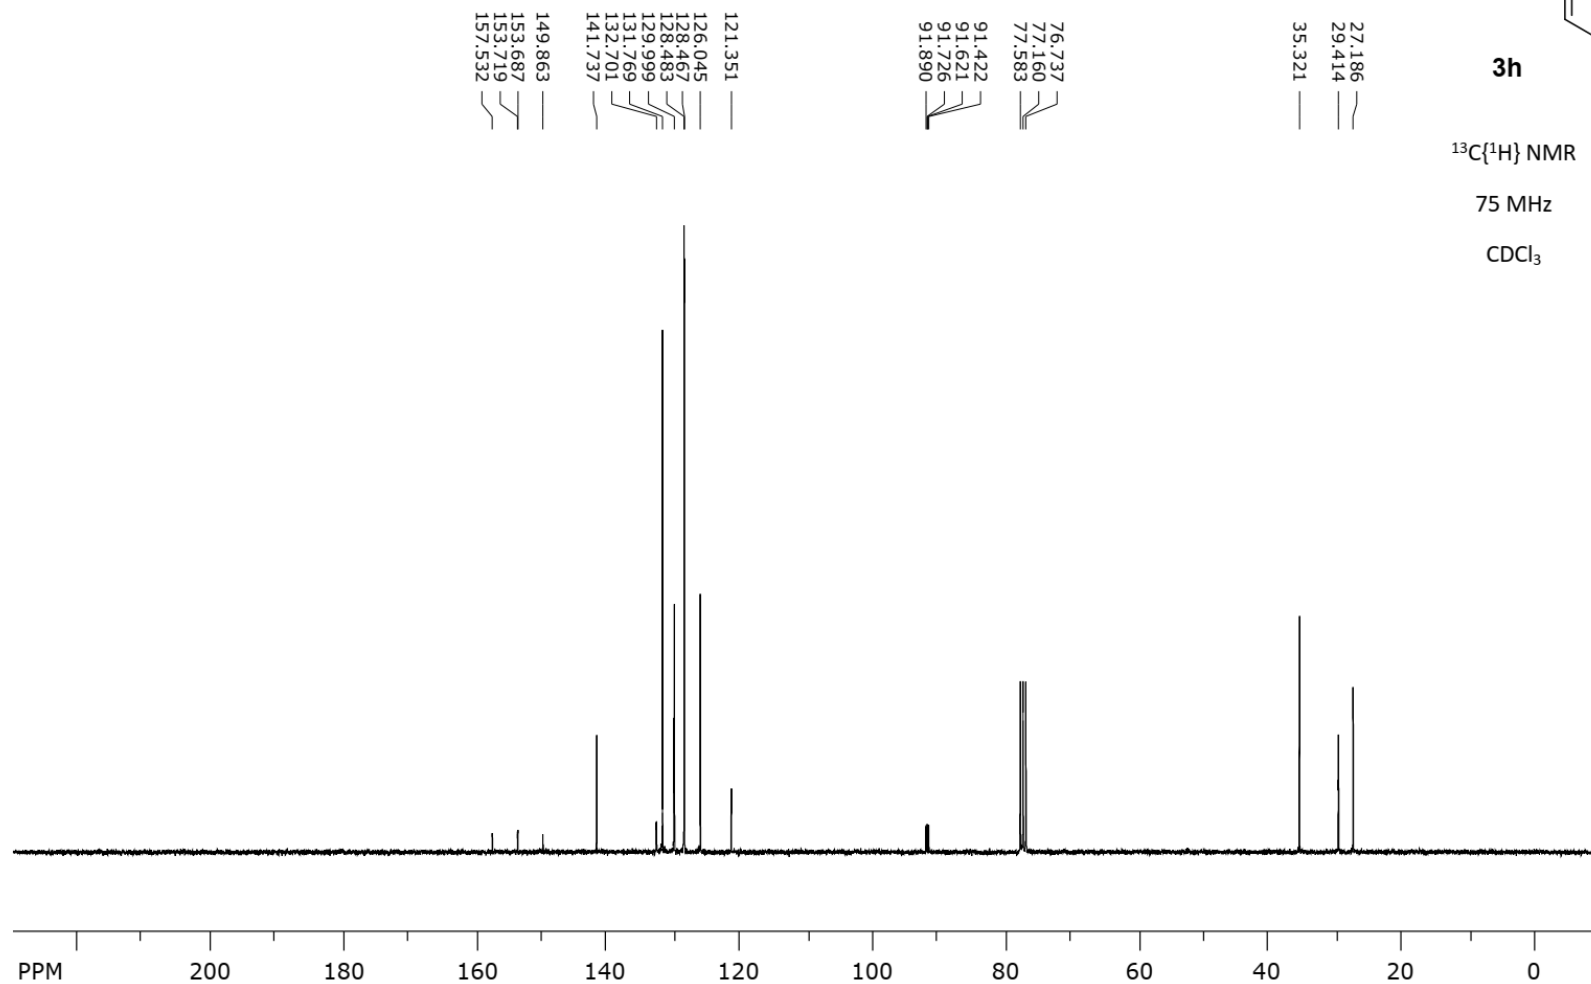



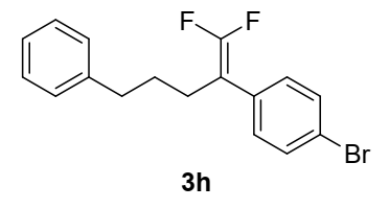

<sup>19</sup>F NMR

282 MHz

CDCl<sub>3</sub>

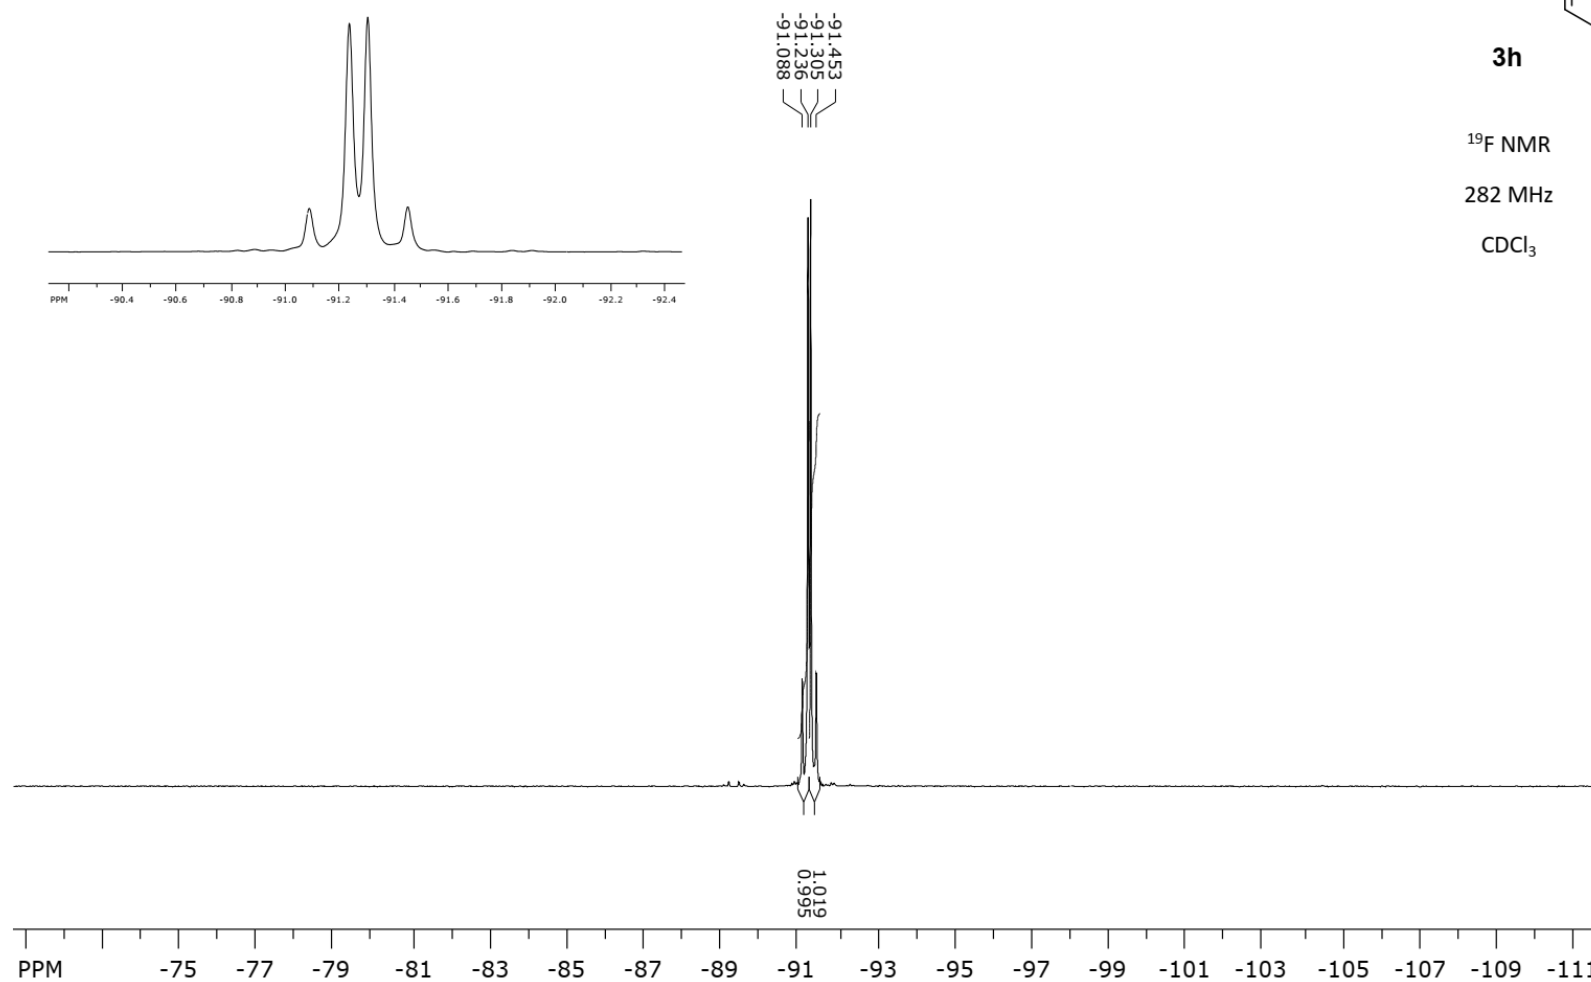

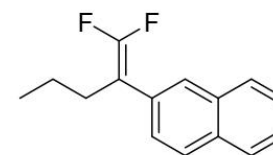**3i**<sup>1</sup>H NMR

300 MHz

CDCl<sub>3</sub>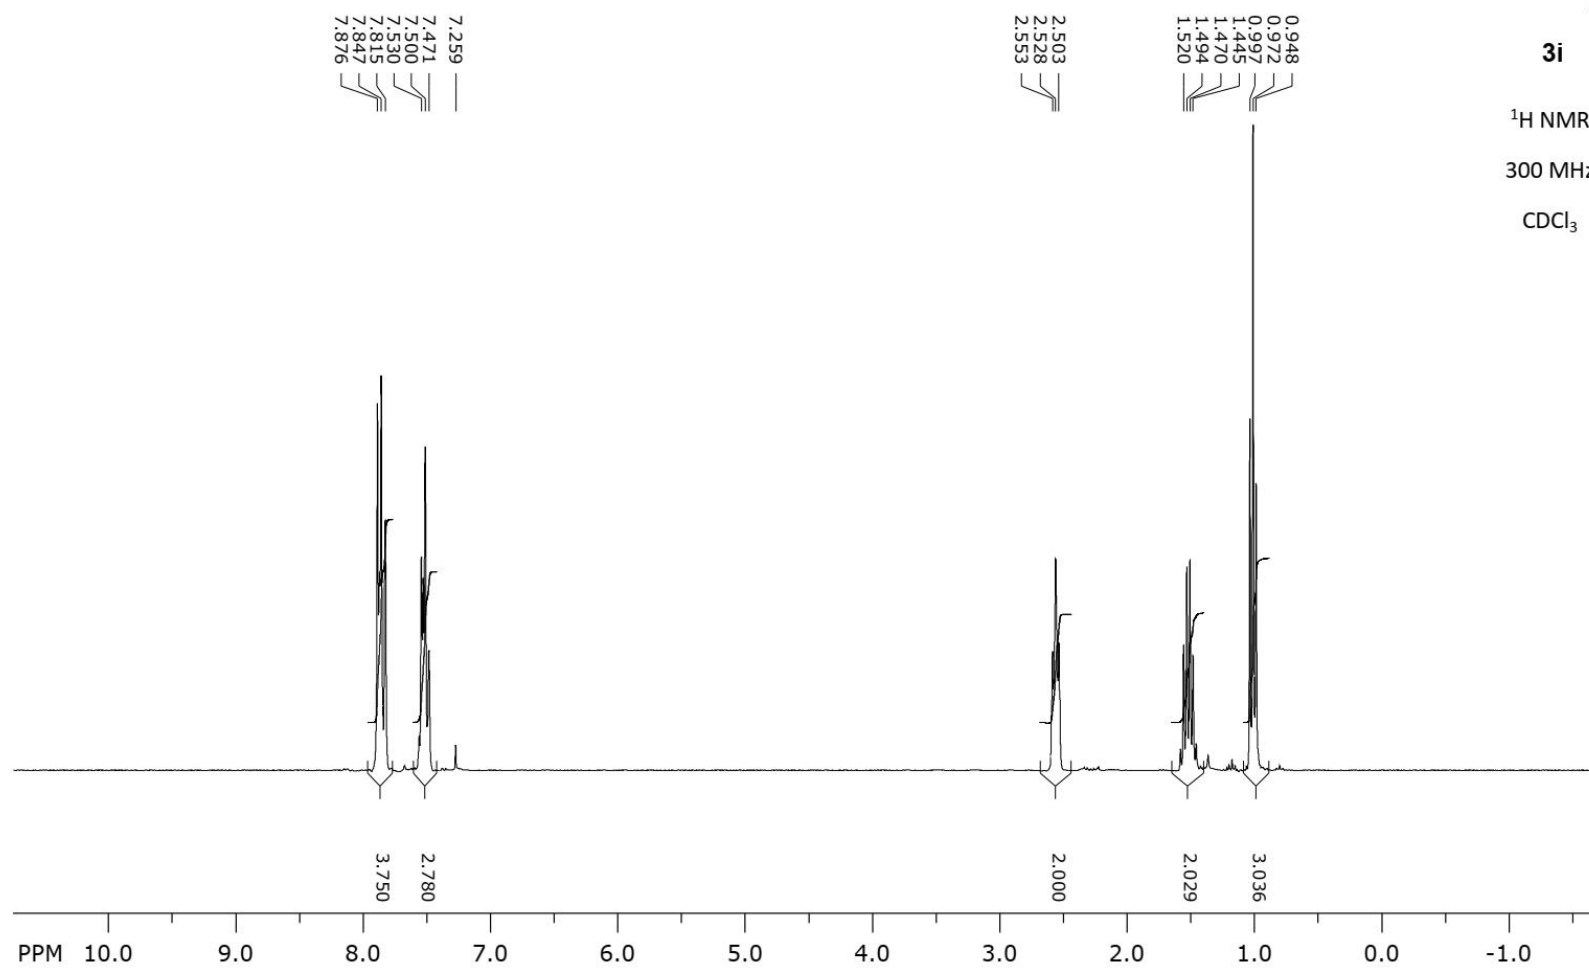

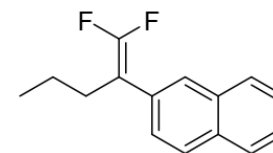**3i** $^{13}\text{C}\{^1\text{H}\}$  NMR

75 MHz

 $\text{CDCl}_3$ 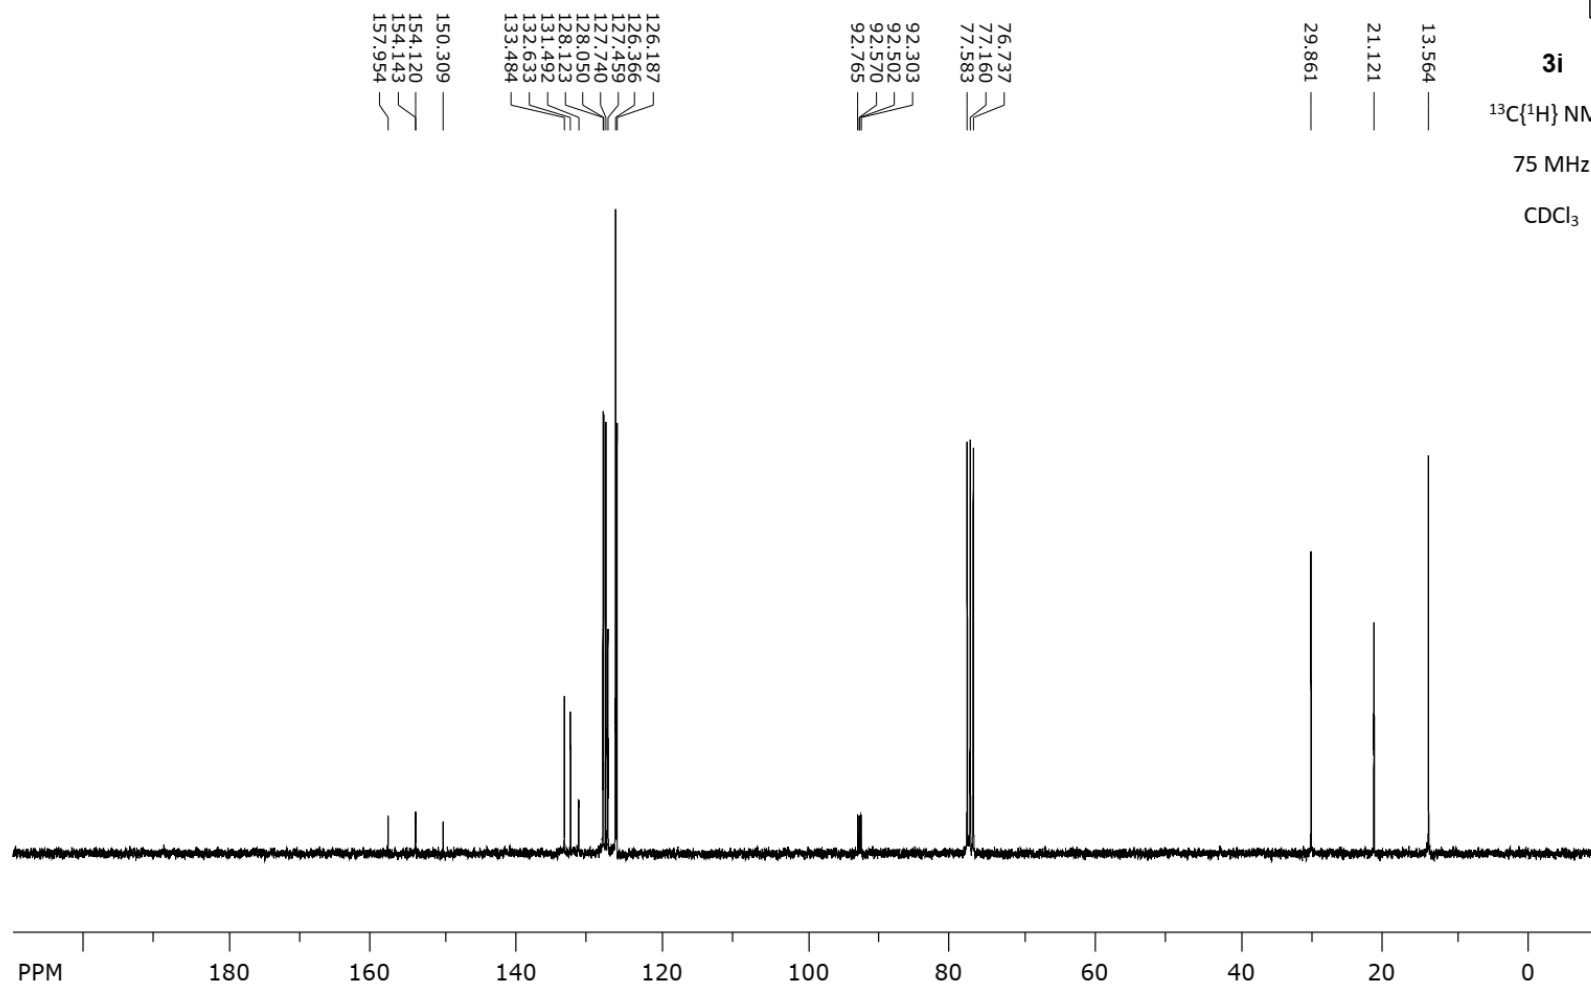

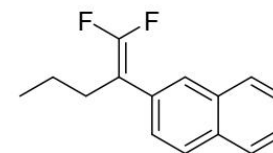**3i**<sup>19</sup>F NMR

282 MHz

CDCl<sub>3</sub>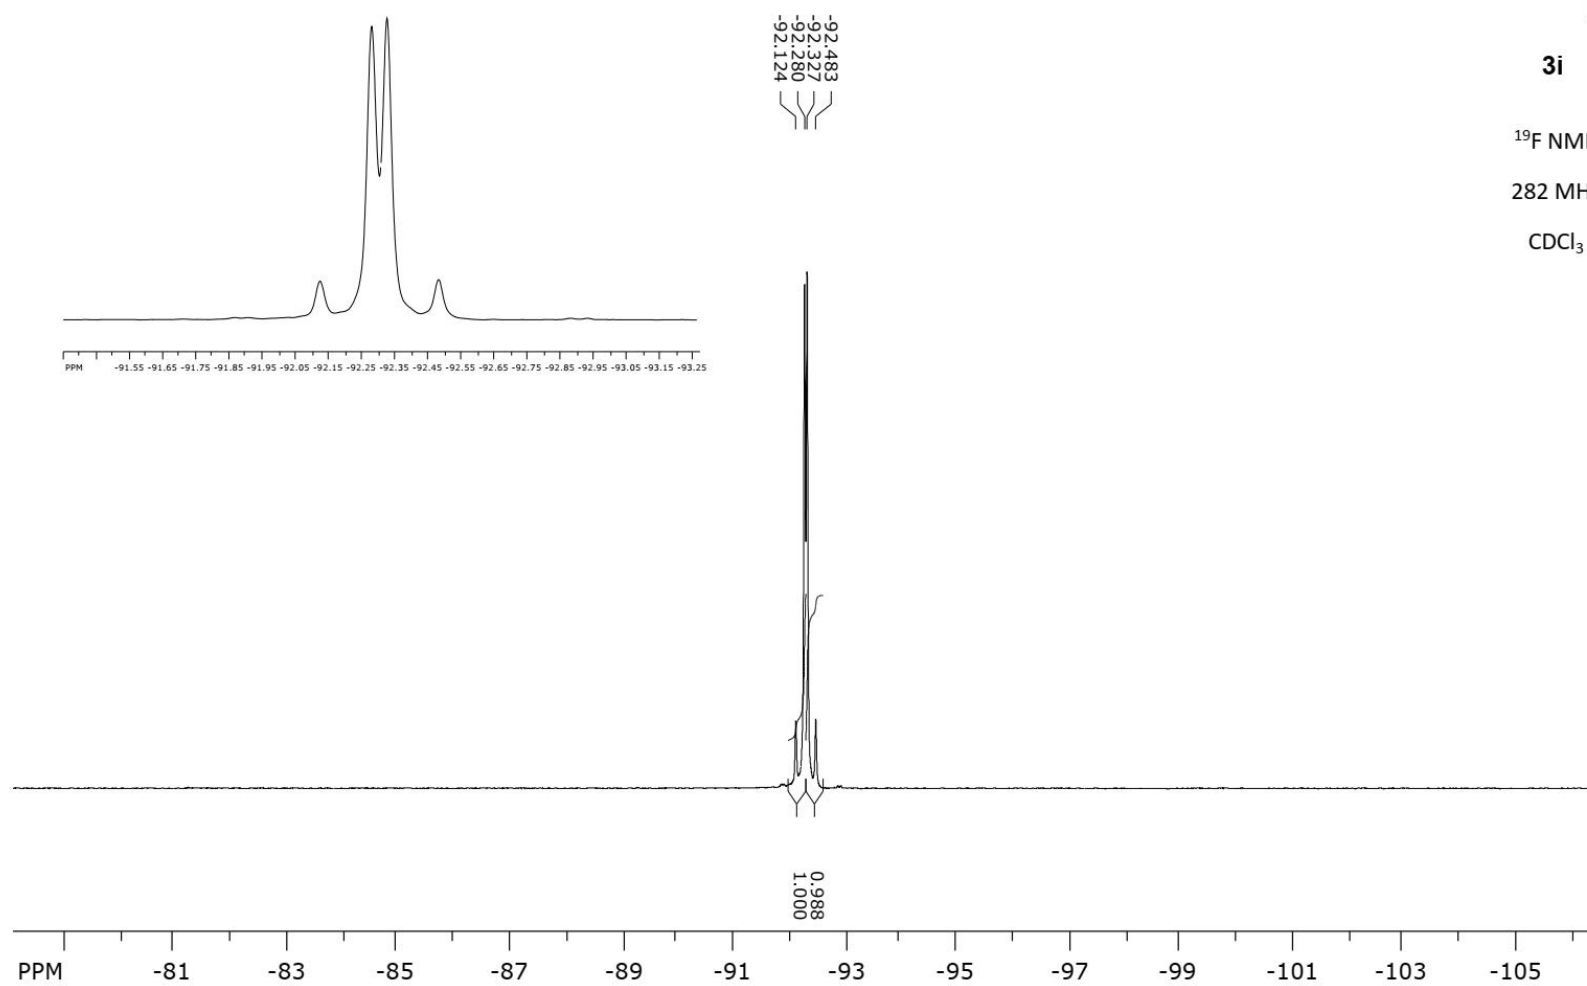

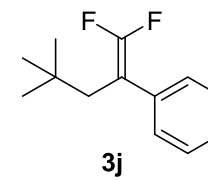<sup>1</sup>H NMR

300 MHz

CDCl<sub>3</sub>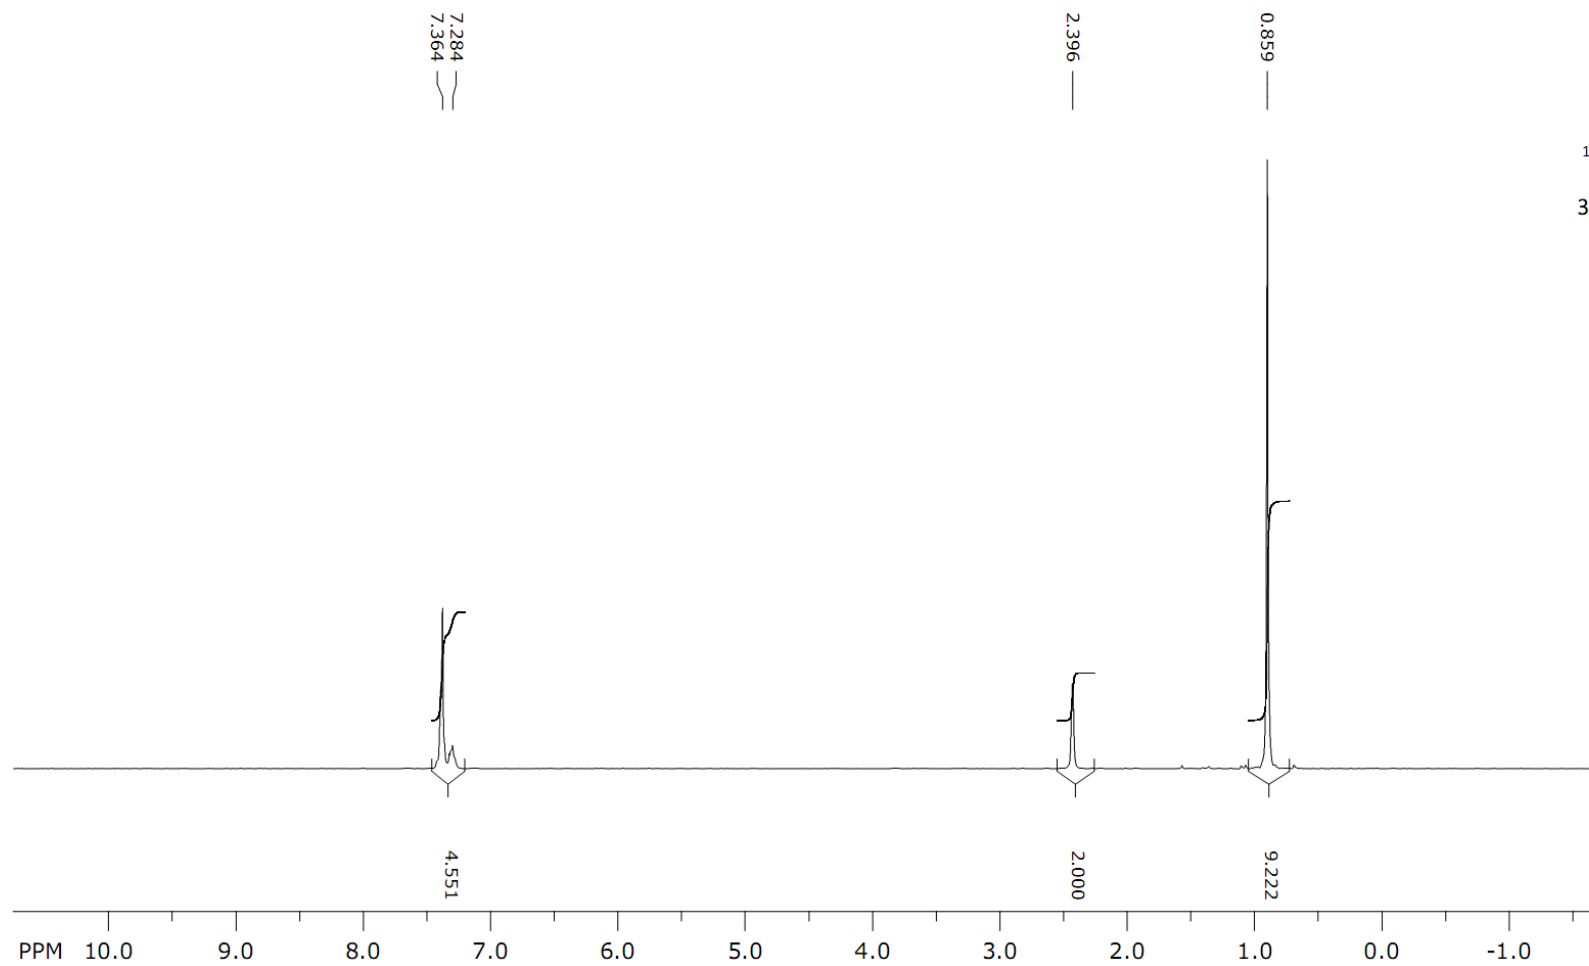

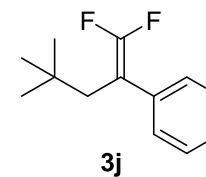

$^{13}\text{C}\{^1\text{H}\}$  NMR

75 MHz

$\text{CDCl}_3$

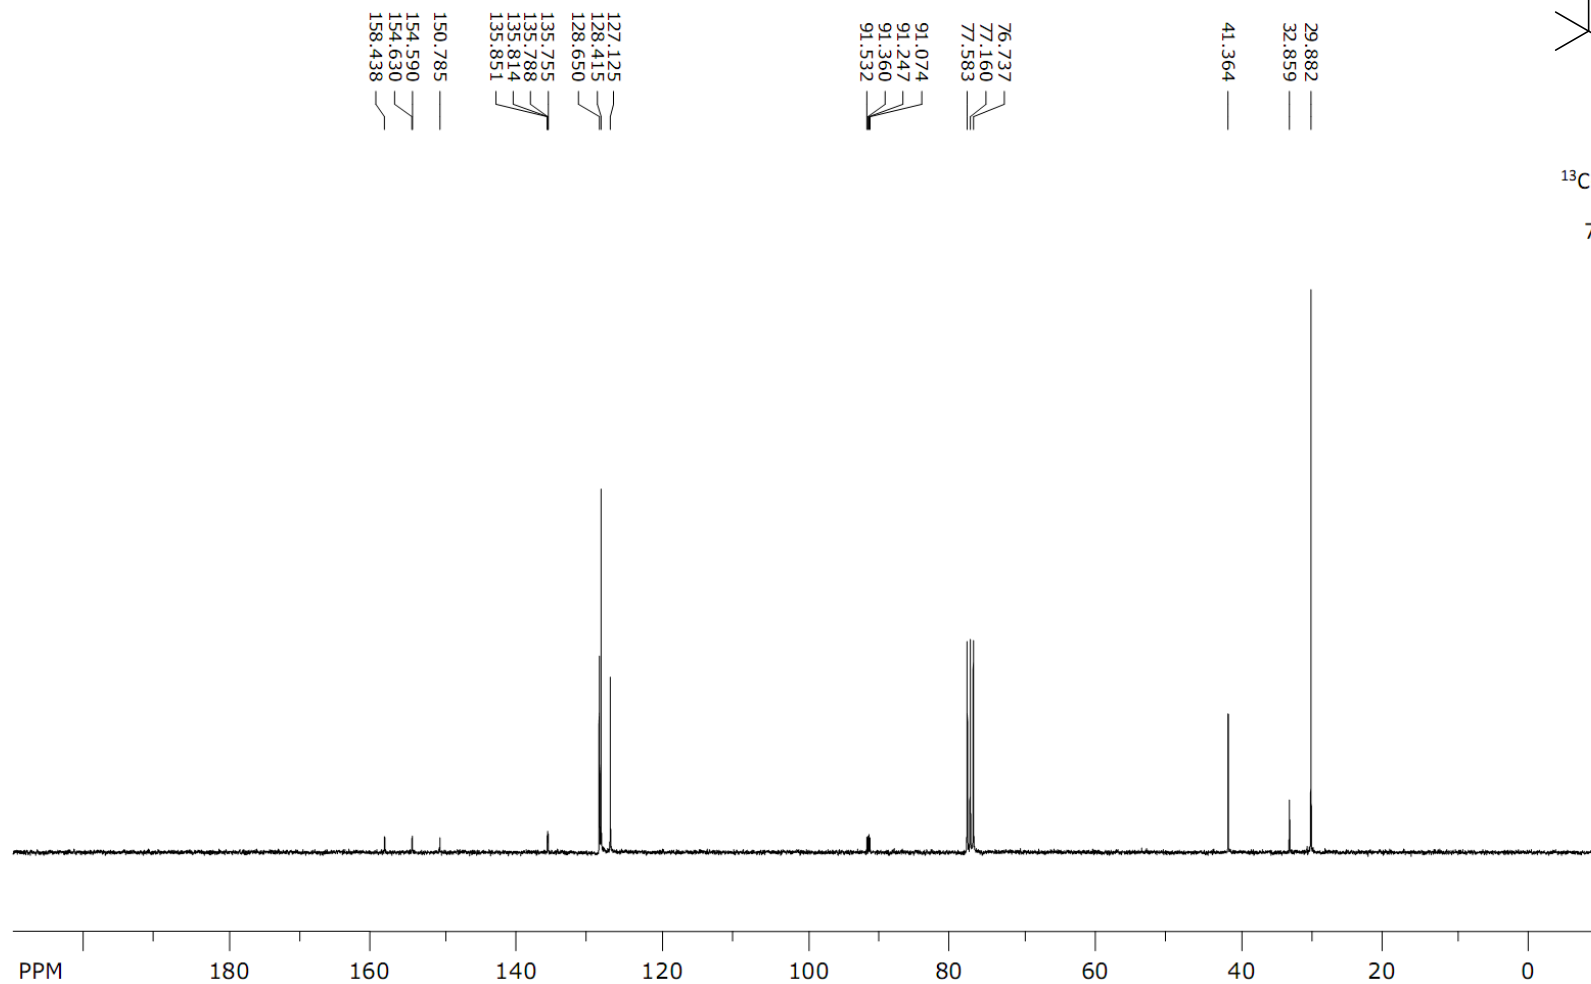

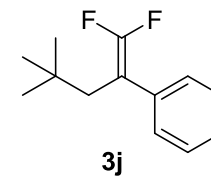

$^{19}\text{F}$  NMR

282 MHz

$\text{CDCl}_3$

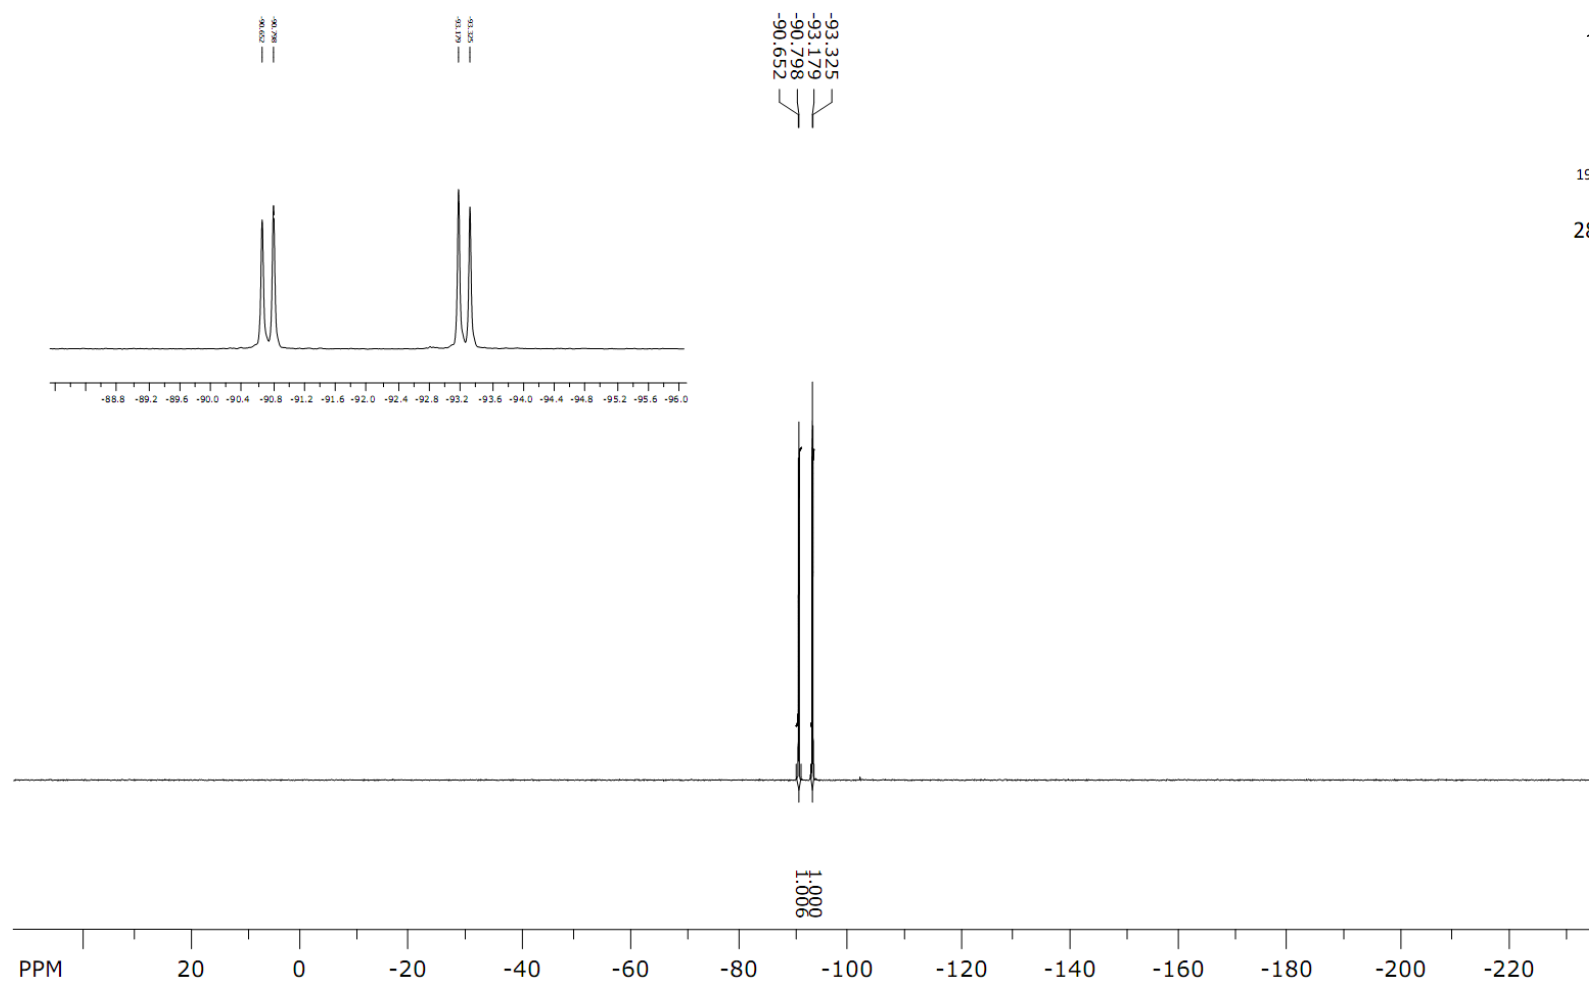

Supplement: s1 [file s1]
